# Supplementary material for: Irrigation quality and management determine salinization in Israeli olive orchards
Source: Copernicus journal article supplement (doi:10.5194/gmd-15-129-2022), 2022-01-10
Supplement: Supplementary file 1 [file gmd-15-129-2022-supplement.pdf]

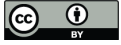

*Supplement of*

## **Irrigation quality and management determine salinization in Israeli olive orchards**

**Vladimir Mirlas et al.**

*Correspondence to:* Yaakov Anker ([kobia@ariel.ac.il](mailto:kobia@ariel.ac.il))

The copyright of individual parts of the supplement might differ from the article licence.



8.9612 2 43-0.14E-01-0.15E+00 0.17E+01 0.20E-07 -60.0-1652.-1187.

Time ItW ItCum vTop SvTop SvRoot SvBot hTop hRoot hBot

|          |   |                       |          |          |                   |
|----------|---|-----------------------|----------|----------|-------------------|
| 11.6602  | 2 | 45-0.15E-01-0.19E+00  | 0.21E+01 | 0.23E-07 | -60.0-2425.-1593. |
| 15.1688  | 3 | 48-0.15E-01-0.24E+00  | 0.25E+01 | 0.19E-07 | -60.0-3743.-2225. |
| 19.7300  | 3 | 51-0.15E-01-0.31E+00  | 0.27E+01 | 0.21E-07 | -60.0-5727.-3174. |
| 25.6595  | 4 | 55-0.15E-01-0.39E+00  | 0.28E+01 | 0.19E-07 | -60.0-6800.-4319. |
| 31.5890  | 3 | 58-0.15E-01-0.48E+00  | 0.30E+01 | 0.15E-07 | -60.0-7066.-5157. |
| 39.2975  | 2 | 60-0.15E-01-0.60E+00  | 0.31E+01 | 0.18E-07 | -60.0-7241.-5986. |
| 49.3184  | 7 | 67-0.15E-01-0.75E+00  | 0.32E+01 | 0.16E-07 | -60.0-7307.-6711. |
| 56.3330  | 7 | 74-0.15E-01-0.85E+00  | 0.33E+01 | 0.18E-07 | -60.0-7296.-7051. |
| 61.2433  | 6 | 80-0.15E-01-0.93E+00  | 0.34E+01 | 0.19E-07 | -60.0-7314.-7239. |
| 66.1536  | 3 | 83-0.15E-01-0.10E+01  | 0.35E+01 | 0.23E-07 | -60.0-7351.-7400. |
| 72.5369  | 4 | 87-0.15E-01-0.11E+01  | 0.36E+01 | 0.19E-07 | -60.0-7375.-7561. |
| 78.9202  | 3 | 90-0.15E-01-0.12E+01  | 0.37E+01 | 0.18E-07 | -60.0-7370.-7674. |
| 87.2186  | 3 | 93-0.15E-01-0.13E+01  | 0.38E+01 | 0.16E-07 | -60.0-7368.-7774. |
| 98.0064  | 8 | 101-0.15E-01-0.15E+01 | 0.39E+01 | 0.15E-07 | -60.0-7339.-7854. |
| 105.5579 | 5 | 106-0.14E-01-0.16E+01 | 0.41E+01 | 0.10E-07 | -60.0-7306.-7893. |
| 113.1093 | 8 | 114-0.15E-01-0.17E+01 | 0.42E+01 | 0.87E-08 | -60.0-7317.-7922. |
| 118.3954 | 3 | 117-0.15E-01-0.18E+01 | 0.43E+01 | 0.12E-07 | -60.0-7324.-7941. |
| 125.2672 | 4 | 121-0.15E-01-0.19E+01 | 0.44E+01 | 0.15E-07 | -60.0-7360.-7962. |
| 132.1391 | 5 | 126-0.15E-01-0.20E+01 | 0.45E+01 | 0.11E-07 | -60.0-7357.-7975. |
| 139.0109 | 3 | 129-0.15E-01-0.21E+01 | 0.46E+01 | 0.13E-07 | -60.0-7358.-7985. |

Time ItW ItCum vTop SvTop SvRoot SvBot hTop hRoot hBot

|          |   |                       |          |          |                   |
|----------|---|-----------------------|----------|----------|-------------------|
| 147.9443 | 2 | 131-0.15E-01-0.22E+01 | 0.47E+01 | 0.11E-07 | -60.0-7356.-7991. |
| 159.4513 | 8 | 139-0.15E-01-0.24E+01 | 0.48E+01 | 0.75E-08 | -60.0-7323.-7996. |
| 167.5062 | 4 | 143-0.14E-01-0.25E+01 | 0.50E+01 | 0.90E-08 | -60.0-7290.-7998. |
| 175.5610 | 9 | 152-0.15E-01-0.26E+01 | 0.51E+01 | 0.14E-07 | -60.0-7301.-7999. |
| 181.2516 | 5 | 157-0.15E-01-0.27E+01 | 0.52E+01 | 0.11E-07 | -60.0-7308.-7999. |
| 187.1265 | 4 | 161-0.15E-01-0.28E+01 | 0.53E+01 | 0.15E-07 | -60.0-7339.-7999. |
| 193.0013 | 3 | 164-0.15E-01-0.29E+01 | 0.54E+01 | 0.15E-07 | -60.0-7356.-8000. |
| 200.8344 | 2 | 166-0.15E-01-0.30E+01 | 0.55E+01 | 0.17E-07 | -60.0-7370.-8000. |
| 210.6258 | 8 | 174-0.15E-01-0.31E+01 | 0.56E+01 | 0.14E-07 | -60.0-7349.-8000. |
| 217.9694 | 6 | 180-0.15E-01-0.33E+01 | 0.57E+01 | 0.15E-07 | -60.0-7322.-8000. |
| 225.3129 | 7 | 187-0.15E-01-0.34E+01 | 0.58E+01 | 0.17E-07 | -60.0-7330.-8000. |
| 230.2086 | 2 | 189-0.15E-01-0.34E+01 | 0.59E+01 | 0.19E-07 | -60.0-7335.-8000. |
| 235.1043 | 3 | 192-0.15E-01-0.35E+01 | 0.60E+01 | 0.17E-07 | -60.0-7360.-8000. |
| 240.0000 | 3 | 195-0.15E-01-0.36E+01 | 0.61E+01 | 0.16E-07 | -60.0-7374.-8000. |
| 247.9639 | 3 | 198-0.15E-01-0.37E+01 | 0.62E+01 | 0.15E-07 | -60.0-7390.-8000. |
| 258.3170 | 8 | 206-0.15E-01-0.39E+01 | 0.63E+01 | 0.15E-07 | -60.0-7352.-8000. |
| 265.5641 | 7 | 213-0.15E-01-0.40E+01 | 0.64E+01 | 0.18E-07 | -60.0-7320.-8000. |
| 270.6371 | 6 | 219-0.15E-01-0.40E+01 | 0.65E+01 | 0.16E-07 | -60.0-7326.-8000. |
| 275.7101 | 3 | 222-0.15E-01-0.41E+01 | 0.66E+01 | 0.12E-07 | -60.0-7353.-8000. |
| 282.3050 | 4 | 226-0.15E-01-0.42E+01 | 0.67E+01 | 0.12E-07 | -60.0-7374.-8000. |

| Time     | ItW | ItCum | vTop      | SvTop     | SvRoot   | SvBot    | hTop  | hRoot  | hBot   |
|----------|-----|-------|-----------|-----------|----------|----------|-------|--------|--------|
| 288.8999 | 3   | 229   | -0.15E-01 | -0.43E+01 | 0.68E+01 | 0.16E-07 | -60.0 | -7368. | -8000. |
| 297.4733 | 3   | 232   | -0.15E-01 | -0.44E+01 | 0.69E+01 | 0.13E-07 | -60.0 | -7364. | -8000. |
| 308.6187 | 8   | 240   | -0.15E-01 | -0.46E+01 | 0.70E+01 | 0.18E-07 | -60.0 | -7333. | -8000. |
| 316.4205 | 5   | 245   | -0.14E-01 | -0.47E+01 | 0.72E+01 | 0.13E-07 | -60.0 | -7299. | -8000. |
| 324.2222 | 8   | 253   | -0.15E-01 | -0.48E+01 | 0.73E+01 | 0.15E-07 | -60.0 | -7310. | -8000. |
| 329.6835 | 4   | 257   | -0.15E-01 | -0.49E+01 | 0.74E+01 | 0.18E-07 | -60.0 | -7316. | -8000. |
| 335.1447 | 4   | 261   | -0.15E-01 | -0.50E+01 | 0.75E+01 | 0.19E-07 | -60.0 | -7345. | -8000. |
| 340.6059 | 3   | 264   | -0.15E-01 | -0.51E+01 | 0.75E+01 | 0.20E-07 | -60.0 | -7362. | -8000. |
| 347.7056 | 2   | 266   | -0.15E-01 | -0.52E+01 | 0.76E+01 | 0.22E-07 | -60.0 | -7376. | -8000. |
| 356.9351 | 6   | 272   | -0.15E-01 | -0.53E+01 | 0.78E+01 | 0.26E-07 | -60.0 | -7361. | -8000. |
| 366.1645 | 8   | 280   | -0.15E-01 | -0.55E+01 | 0.79E+01 | 0.29E-07 | -60.0 | -7329. | -8000. |
| 372.6252 | 4   | 284   | -0.15E-01 | -0.56E+01 | 0.80E+01 | 0.33E-07 | -60.0 | -7317. | -8000. |
| 379.0858 | 5   | 289   | -0.15E-01 | -0.57E+01 | 0.81E+01 | 0.37E-07 | -60.0 | -7337. | -8000. |
| 385.5465 | 4   | 293   | -0.15E-01 | -0.58E+01 | 0.82E+01 | 0.40E-07 | -60.0 | -7349. | -8000. |
| 392.0071 | 2   | 295   | -0.15E-01 | -0.58E+01 | 0.83E+01 | 0.44E-07 | -60.0 | -7357. | -8000. |
| 400.8064 | 4   | 299   | -0.15E-01 | -0.60E+01 | 0.84E+01 | 0.41E-07 | -60.0 | -7361. | -8000. |
| 409.6057 | 7   | 306   | -0.15E-01 | -0.61E+01 | 0.85E+01 | 0.42E-07 | -60.0 | -7335. | -8000. |
| 415.4849 | 3   | 309   | -0.15E-01 | -0.62E+01 | 0.86E+01 | 0.43E-07 | -60.0 | -7326. | -8000. |
| 423.5493 | 6   | 315   | -0.15E-01 | -0.63E+01 | 0.88E+01 | 0.46E-07 | -60.0 | -7356. | -8000. |
| 431.6137 | 7   | 322   | -0.15E-01 | -0.64E+01 | 0.89E+01 | 0.50E-07 | -60.0 | -7343. | -8000. |

| Time     | ItW | ItCum | vTop      | SvTop     | SvRoot   | SvBot    | hTop  | hRoot  | hBot   |
|----------|-----|-------|-----------|-----------|----------|----------|-------|--------|--------|
| 436.9899 | 3   | 325   | -0.15E-01 | -0.65E+01 | 0.90E+01 | 0.54E-07 | -60.0 | -7338. | -8000. |
| 444.1583 | 4   | 329   | -0.15E-01 | -0.66E+01 | 0.91E+01 | 0.58E-07 | -60.0 | -7367. | -8000. |
| 451.3266 | 6   | 335   | -0.15E-01 | -0.67E+01 | 0.92E+01 | 0.62E-07 | -60.0 | -7358. | -8000. |
| 458.4950 | 3   | 338   | -0.15E-01 | -0.68E+01 | 0.93E+01 | 0.59E-07 | -60.0 | -7355. | -8000. |
| 469.2475 | 2   | 340   | -0.15E-01 | -0.70E+01 | 0.94E+01 | 0.61E-07 | -60.0 | -7349. | -8000. |
| 480.0000 | 8   | 348   | -0.14E-01 | -0.72E+01 | 0.96E+01 | 0.60E-07 | -60.0 | -7299. | -8000. |
| 486.3291 | 4   | 352   | -0.15E-01 | -0.72E+01 | 0.97E+01 | 0.62E-07 | -60.0 | -7285. | -8000. |
| 492.6582 | 8   | 360   | -0.18E-01 | -0.74E+01 | 0.98E+01 | 0.62E-07 | -60.0 | -7330. | -8000. |
| 497.0886 | 4   | 364   | -0.18E-01 | -0.74E+01 | 0.99E+01 | 0.63E-07 | -60.0 | -7352. | -8000. |
| 501.5190 | 4   | 368   | -0.18E-01 | -0.75E+01 | 0.10E+02 | 0.65E-07 | -60.0 | -7401. | -8000. |
| 505.9494 | 4   | 372   | -0.19E-01 | -0.76E+01 | 0.10E+02 | 0.65E-07 | -60.0 | -7430. | -8000. |
| 510.3798 | 4   | 376   | -0.19E-01 | -0.77E+01 | 0.10E+02 | 0.64E-07 | -60.0 | -7448. | -8000. |
| 514.8102 | 2   | 378   | -0.19E-01 | -0.78E+01 | 0.10E+02 | 0.64E-07 | -60.0 | -7457. | -8000. |
| 520.5697 | 3   | 381   | -0.19E-01 | -0.79E+01 | 0.10E+02 | 0.64E-07 | -60.0 | -7462. | -8000. |
| 528.0570 | 5   | 386   | -0.19E-01 | -0.80E+01 | 0.10E+02 | 0.63E-07 | -60.0 | -7439. | -8000. |
| 535.5444 | 6   | 392   | -0.18E-01 | -0.82E+01 | 0.11E+02 | 0.66E-07 | -60.0 | -7400. | -8000. |
| 543.0317 | 7   | 399   | -0.17E-01 | -0.83E+01 | 0.11E+02 | 0.69E-07 | -60.0 | -7381. | -8000. |
| 548.2728 | 3   | 402   | -0.17E-01 | -0.84E+01 | 0.11E+02 | 0.72E-07 | -60.0 | -7374. | -8000. |
| 555.0863 | 7   | 409   | -0.18E-01 | -0.85E+01 | 0.11E+02 | 0.69E-07 | -60.0 | -7412. | -8000. |
| 559.8558 | 7   | 416   | -0.18E-01 | -0.86E+01 | 0.11E+02 | 0.68E-07 | -60.0 | -7406. | -8000. |

| Time | ItW | ItCum | vTop | SvTop | SvRoot | SvBot | hTop | hRoot | hBot |
|------|-----|-------|------|-------|--------|-------|------|-------|------|
|------|-----|-------|------|-------|--------|-------|------|-------|------|

|          |   |                       |          |          |                   |
|----------|---|-----------------------|----------|----------|-------------------|
| 563.1944 | 4 | 420-0.18E-01-0.86E+01 | 0.11E+02 | 0.69E-07 | -60.0-7421.-8000. |
| 566.5330 | 3 | 423-0.19E-01-0.87E+01 | 0.11E+02 | 0.70E-07 | -60.0-7451.-8000. |
| 570.8732 | 3 | 426-0.19E-01-0.88E+01 | 0.11E+02 | 0.71E-07 | -60.0-7475.-8000. |
| 576.5154 | 4 | 430-0.19E-01-0.89E+01 | 0.11E+02 | 0.72E-07 | -60.0-7470.-8000. |
| 582.1577 | 4 | 434-0.19E-01-0.90E+01 | 0.11E+02 | 0.71E-07 | -60.0-7450.-8000. |
| 587.7999 | 5 | 439-0.18E-01-0.91E+01 | 0.12E+02 | 0.69E-07 | -60.0-7442.-8000. |
| 593.4422 | 2 | 441-0.19E-01-0.92E+01 | 0.12E+02 | 0.70E-07 | -60.0-7435.-8000. |
| 600.7771 | 2 | 443-0.19E-01-0.93E+01 | 0.12E+02 | 0.71E-07 | -60.0-7430.-8000. |
| 610.3125 | 9 | 452-0.17E-01-0.95E+01 | 0.12E+02 | 0.73E-07 | -60.0-7391.-8000. |
| 616.9873 | 3 | 455-0.16E-01-0.96E+01 | 0.12E+02 | 0.73E-07 | -60.0-7358.-8000. |
| 625.6645 | 9 | 464-0.18E-01-0.98E+01 | 0.12E+02 | 0.72E-07 | -60.0-7376.-8000. |
| 631.7385 | 7 | 471-0.16E-01-0.99E+01 | 0.12E+02 | 0.74E-07 | -60.0-7358.-8000. |
| 635.9904 | 6 | 477-0.18E-01-0.99E+01 | 0.12E+02 | 0.76E-07 | -60.0-7373.-8000. |
| 640.2422 | 5 | 482-0.18E-01-0.10E+02 | 0.12E+02 | 0.77E-07 | -60.0-7412.-8000. |
| 644.4940 | 4 | 486-0.19E-01-0.10E+02 | 0.13E+02 | 0.79E-07 | -60.0-7439.-8000. |
| 648.7459 | 3 | 489-0.19E-01-0.10E+02 | 0.13E+02 | 0.80E-07 | -60.0-7454.-8000. |
| 654.2733 | 3 | 492-0.19E-01-0.10E+02 | 0.13E+02 | 0.81E-07 | -60.0-7465.-8000. |
| 661.5762 | 6 | 498-0.19E-01-0.10E+02 | 0.13E+02 | 0.83E-07 | -60.0-7445.-8000. |
| 668.8792 | 7 | 505-0.18E-01-0.11E+02 | 0.13E+02 | 0.85E-07 | -60.0-7407.-8000. |
| 673.9913 | 5 | 510-0.18E-01-0.11E+02 | 0.13E+02 | 0.88E-07 | -60.0-7395.-8000. |

Time ItW ItCum vTop SvTop SvRoot SvBot hTop hRoot hBot

|          |   |                       |          |          |                   |
|----------|---|-----------------------|----------|----------|-------------------|
| 679.1034 | 7 | 517-0.18E-01-0.11E+02 | 0.13E+02 | 0.90E-07 | -60.0-7415.-8000. |
| 682.6243 | 3 | 520-0.19E-01-0.11E+02 | 0.13E+02 | 0.91E-07 | -60.0-7425.-8000. |
| 687.2963 | 4 | 524-0.19E-01-0.11E+02 | 0.13E+02 | 0.93E-07 | -60.0-7462.-8000. |
| 691.9682 | 6 | 530-0.19E-01-0.11E+02 | 0.13E+02 | 0.96E-07 | -60.0-7462.-8000. |
| 696.6402 | 4 | 534-0.19E-01-0.11E+02 | 0.14E+02 | 0.99E-07 | -60.0-7461.-8000. |
| 701.3122 | 3 | 537-0.19E-01-0.11E+02 | 0.14E+02 | 0.10E-06 | -60.0-7461.-8000. |
| 707.5414 | 3 | 540-0.19E-01-0.11E+02 | 0.14E+02 | 0.10E-06 | -60.0-7460.-8000. |
| 713.7707 | 7 | 547-0.18E-01-0.11E+02 | 0.14E+02 | 0.10E-06 | -60.0-7436.-8000. |
| 720.0000 | 5 | 552-0.18E-01-0.11E+02 | 0.14E+02 | 0.11E-06 | -60.0-7424.-8000. |
| 725.4149 | 2 | 554-0.19E-01-0.12E+02 | 0.14E+02 | 0.11E-06 | -60.0-7417.-8000. |
| 732.4542 | 6 | 560-0.20E-01-0.12E+02 | 0.14E+02 | 0.11E-06 | -60.0-7436.-8000. |
| 739.4935 | 9 | 569-0.18E-01-0.12E+02 | 0.14E+02 | 0.11E-06 | -60.0-7411.-8000. |
| 744.4210 | 5 | 574-0.18E-01-0.12E+02 | 0.14E+02 | 0.12E-06 | -60.0-7401.-8000. |
| 749.3485 | 7 | 581-0.20E-01-0.12E+02 | 0.15E+02 | 0.12E-06 | -60.0-7428.-8000. |
| 752.7978 | 4 | 585-0.20E-01-0.12E+02 | 0.15E+02 | 0.12E-06 | -60.0-7440.-8000. |
| 756.2471 | 4 | 589-0.21E-01-0.12E+02 | 0.15E+02 | 0.12E-06 | -60.0-7473.-8000. |
| 759.6963 | 6 | 595-0.21E-01-0.12E+02 | 0.15E+02 | 0.12E-06 | -60.0-7493.-8000. |
| 763.1456 | 3 | 598-0.21E-01-0.12E+02 | 0.15E+02 | 0.12E-06 | -60.0-7505.-8000. |
| 767.6296 | 2 | 600-0.21E-01-0.12E+02 | 0.15E+02 | 0.13E-06 | -60.0-7513.-8000. |
| 773.4589 | 7 | 607-0.21E-01-0.13E+02 | 0.15E+02 | 0.13E-06 | -60.0-7496.-8000. |

Time ItW ItCum vTop SvTop SvRoot SvBot hTop hRoot hBot

|          |   |                       |          |          |                   |
|----------|---|-----------------------|----------|----------|-------------------|
| 777.5394 | 6 | 613-0.20E-01-0.13E+02 | 0.15E+02 | 0.13E-06 | -60.0-7474.-8000. |
| 781.6199 | 7 | 620-0.21E-01-0.13E+02 | 0.15E+02 | 0.13E-06 | -60.0-7483.-8000. |

|          |   |                       |          |          |                   |
|----------|---|-----------------------|----------|----------|-------------------|
| 784.4762 | 3 | 623-0.21E-01-0.13E+02 | 0.15E+02 | 0.13E-06 | -60.0-7488.-8000. |
| 788.1894 | 4 | 627-0.21E-01-0.13E+02 | 0.15E+02 | 0.13E-06 | -60.0-7514.-8000. |
| 791.9027 | 3 | 630-0.21E-01-0.13E+02 | 0.15E+02 | 0.13E-06 | -60.0-7511.-8000. |
| 796.7299 | 3 | 633-0.21E-01-0.13E+02 | 0.16E+02 | 0.13E-06 | -60.0-7512.-8000. |
| 803.0052 | 7 | 640-0.21E-01-0.13E+02 | 0.16E+02 | 0.14E-06 | -60.0-7486.-8000. |
| 807.3980 | 5 | 645-0.20E-01-0.13E+02 | 0.16E+02 | 0.14E-06 | -60.0-7460.-8000. |
| 811.7908 | 7 | 652-0.20E-01-0.13E+02 | 0.16E+02 | 0.14E-06 | -60.0-7471.-8000. |
| 814.8657 | 4 | 656-0.21E-01-0.13E+02 | 0.16E+02 | 0.14E-06 | -60.0-7475.-8000. |
| 817.9406 | 5 | 661-0.21E-01-0.13E+02 | 0.16E+02 | 0.14E-06 | -60.0-7497.-8000. |
| 821.0155 | 3 | 664-0.21E-01-0.14E+02 | 0.16E+02 | 0.14E-06 | -60.0-7511.-8000. |
| 825.0130 | 3 | 667-0.21E-01-0.14E+02 | 0.16E+02 | 0.15E-06 | -60.0-7521.-8000. |
| 830.2096 | 6 | 673-0.21E-01-0.14E+02 | 0.16E+02 | 0.15E-06 | -60.0-7509.-8000. |
| 835.4062 | 5 | 678-0.20E-01-0.14E+02 | 0.16E+02 | 0.15E-06 | -60.0-7483.-8000. |
| 840.6028 | 6 | 684-0.20E-01-0.14E+02 | 0.16E+02 | 0.15E-06 | -60.0-7470.-8000. |
| 845.7995 | 3 | 687-0.20E-01-0.14E+02 | 0.16E+02 | 0.15E-06 | -60.0-7463.-8000. |
| 852.5551 | 3 | 690-0.20E-01-0.14E+02 | 0.17E+02 | 0.15E-06 | -60.0-7458.-8000. |
| 861.3374 | 8 | 698-0.18E-01-0.14E+02 | 0.17E+02 | 0.15E-06 | -60.0-7416.-8000. |
| 867.4850 | 3 | 701-0.17E-01-0.14E+02 | 0.17E+02 | 0.15E-06 | -60.0-7382.-8000. |

Time ItW ItCum vTop SvTop SvRoot SvBot hTop hRoot hBot

|          |   |                       |          |          |                   |
|----------|---|-----------------------|----------|----------|-------------------|
| 875.4769 | 8 | 709-0.19E-01-0.15E+02 | 0.17E+02 | 0.15E-06 | -60.0-7401.-8000. |
| 881.0713 | 7 | 716-0.17E-01-0.15E+02 | 0.17E+02 | 0.15E-06 | -60.0-7382.-8000. |
| 884.9873 | 5 | 721-0.19E-01-0.15E+02 | 0.17E+02 | 0.15E-06 | -60.0-7398.-8000. |
| 888.9033 | 5 | 726-0.20E-01-0.15E+02 | 0.17E+02 | 0.15E-06 | -60.0-7441.-8000. |
| 892.8193 | 4 | 730-0.21E-01-0.15E+02 | 0.17E+02 | 0.15E-06 | -60.0-7468.-8000. |
| 896.7354 | 4 | 734-0.21E-01-0.15E+02 | 0.17E+02 | 0.15E-06 | -60.0-7485.-8000. |
| 900.6514 | 2 | 736-0.21E-01-0.15E+02 | 0.18E+02 | 0.15E-06 | -60.0-7495.-8000. |
| 905.7422 | 6 | 742-0.21E-01-0.15E+02 | 0.18E+02 | 0.15E-06 | -60.0-7502.-8000. |
| 910.8331 | 6 | 748-0.20E-01-0.15E+02 | 0.18E+02 | 0.15E-06 | -60.0-7482.-8000. |
| 915.7498 | 5 | 753-0.20E-01-0.15E+02 | 0.18E+02 | 0.15E-06 | -60.0-7473.-8000. |
| 920.6665 | 4 | 757-0.20E-01-0.15E+02 | 0.18E+02 | 0.15E-06 | -60.0-7470.-8000. |
| 925.5832 | 2 | 759-0.20E-01-0.16E+02 | 0.18E+02 | 0.15E-06 | -60.0-7469.-8000. |
| 932.4665 | 2 | 761-0.20E-01-0.16E+02 | 0.18E+02 | 0.15E-06 | -60.0-7466.-8000. |
| 941.6444 | 9 | 770-0.18E-01-0.16E+02 | 0.18E+02 | 0.15E-06 | -60.0-7414.-8000. |
| 947.7629 | 4 | 774-0.17E-01-0.16E+02 | 0.18E+02 | 0.15E-06 | -60.0-7378.-8000. |
| 953.8815 | 8 | 782-0.19E-01-0.16E+02 | 0.19E+02 | 0.15E-06 | -60.0-7393.-8000. |
| 960.0000 | 5 | 787-0.19E-01-0.16E+02 | 0.19E+02 | 0.15E-06 | -60.0-7403.-8000. |
| 964.2157 | 2 | 789-0.19E-01-0.16E+02 | 0.19E+02 | 0.15E-06 | -60.0-7408.-8000. |
| 969.6962 | 6 | 795-0.20E-01-0.16E+02 | 0.19E+02 | 0.16E-06 | -60.0-7457.-8000. |
| 975.1766 | 8 | 803-0.20E-01-0.17E+02 | 0.19E+02 | 0.16E-06 | -60.0-7453.-8000. |

Time ItW ItCum vTop SvTop SvRoot SvBot hTop hRoot hBot

|          |   |                       |          |          |                   |
|----------|---|-----------------------|----------|----------|-------------------|
| 979.0129 | 3 | 806-0.20E-01-0.17E+02 | 0.19E+02 | 0.16E-06 | -60.0-7450.-8000. |
| 984.0001 | 6 | 812-0.21E-01-0.17E+02 | 0.19E+02 | 0.16E-06 | -60.0-7482.-8000. |
| 988.9873 | 6 | 818-0.20E-01-0.17E+02 | 0.19E+02 | 0.16E-06 | -60.0-7474.-8000. |
| 993.9745 | 4 | 822-0.20E-01-0.17E+02 | 0.19E+02 | 0.16E-06 | -60.0-7470.-8000. |

|           |   |                       |          |          |                   |
|-----------|---|-----------------------|----------|----------|-------------------|
| 998.9617  | 2 | 824-0.20E-01-0.17E+02 | 0.19E+02 | 0.16E-06 | -60.0-7466.-8000. |
| 1005.4451 | 2 | 826-0.20E-01-0.17E+02 | 0.20E+02 | 0.16E-06 | -60.0-7464.-8000. |
| 1013.8735 | 8 | 834-0.18E-01-0.17E+02 | 0.20E+02 | 0.16E-06 | -60.0-7426.-8000. |
| 1019.7733 | 4 | 838-0.17E-01-0.17E+02 | 0.20E+02 | 0.16E-06 | -60.0-7392.-8000. |
| 1025.6732 | 8 | 846-0.19E-01-0.18E+02 | 0.20E+02 | 0.16E-06 | -60.0-7405.-8000. |
| 1029.8031 | 4 | 850-0.19E-01-0.18E+02 | 0.20E+02 | 0.16E-06 | -60.0-7412.-8000. |
| 1033.9330 | 5 | 855-0.20E-01-0.18E+02 | 0.20E+02 | 0.16E-06 | -60.0-7447.-8000. |
| 1038.0629 | 4 | 859-0.21E-01-0.18E+02 | 0.20E+02 | 0.16E-06 | -60.0-7468.-8000. |
| 1042.1928 | 4 | 863-0.21E-01-0.18E+02 | 0.20E+02 | 0.16E-06 | -60.0-7482.-8000. |
| 1046.3227 | 2 | 865-0.21E-01-0.18E+02 | 0.20E+02 | 0.16E-06 | -60.0-7489.-8000. |
| 1051.6915 | 6 | 871-0.21E-01-0.18E+02 | 0.20E+02 | 0.16E-06 | -60.0-7495.-8000. |
| 1057.0604 | 7 | 878-0.20E-01-0.18E+02 | 0.21E+02 | 0.16E-06 | -60.0-7474.-8000. |
| 1060.8186 | 4 | 882-0.20E-01-0.18E+02 | 0.21E+02 | 0.16E-06 | -60.0-7466.-8000. |
| 1064.5768 | 4 | 886-0.21E-01-0.18E+02 | 0.21E+02 | 0.16E-06 | -60.0-7484.-8000. |
| 1068.3350 | 6 | 892-0.21E-01-0.18E+02 | 0.21E+02 | 0.16E-06 | -60.0-7495.-8000. |
| 1072.0933 | 3 | 895-0.21E-01-0.18E+02 | 0.21E+02 | 0.16E-06 | -60.0-7503.-8000. |

Time ItW ItCum vTop SvTop SvRoot SvBot hTop hRoot hBot

|           |   |                       |          |          |                   |
|-----------|---|-----------------------|----------|----------|-------------------|
| 1076.9789 | 2 | 897-0.21E-01-0.19E+02 | 0.21E+02 | 0.16E-06 | -60.0-7506.-8000. |
| 1083.3303 | 7 | 904-0.20E-01-0.19E+02 | 0.21E+02 | 0.16E-06 | -60.0-7483.-8000. |
| 1087.7763 | 5 | 909-0.19E-01-0.19E+02 | 0.21E+02 | 0.16E-06 | -60.0-7457.-8000. |
| 1092.2222 | 7 | 916-0.20E-01-0.19E+02 | 0.21E+02 | 0.16E-06 | -60.0-7468.-8000. |
| 1095.3344 | 3 | 919-0.21E-01-0.19E+02 | 0.21E+02 | 0.16E-06 | -60.0-7473.-8000. |
| 1099.3802 | 4 | 923-0.21E-01-0.19E+02 | 0.21E+02 | 0.16E-06 | -60.0-7505.-8000. |
| 1103.4260 | 7 | 930-0.21E-01-0.19E+02 | 0.22E+02 | 0.16E-06 | -60.0-7503.-8000. |
| 1106.2581 | 2 | 932-0.21E-01-0.19E+02 | 0.22E+02 | 0.16E-06 | -60.0-7502.-8000. |
| 1109.9398 | 4 | 936-0.21E-01-0.19E+02 | 0.22E+02 | 0.16E-06 | -60.0-7520.-8000. |
| 1113.6215 | 3 | 939-0.21E-01-0.19E+02 | 0.22E+02 | 0.16E-06 | -60.0-7515.-8000. |
| 1118.4077 | 3 | 942-0.21E-01-0.19E+02 | 0.22E+02 | 0.16E-06 | -60.0-7514.-8000. |
| 1124.6298 | 7 | 949-0.21E-01-0.20E+02 | 0.22E+02 | 0.16E-06 | -60.0-7488.-8000. |
| 1128.9853 | 5 | 954-0.20E-01-0.20E+02 | 0.22E+02 | 0.16E-06 | -60.0-7462.-8000. |
| 1133.3407 | 7 | 961-0.20E-01-0.20E+02 | 0.22E+02 | 0.16E-06 | -60.0-7472.-8000. |
| 1136.3895 | 4 | 965-0.21E-01-0.20E+02 | 0.22E+02 | 0.16E-06 | -60.0-7477.-8000. |
| 1139.4383 | 5 | 970-0.21E-01-0.20E+02 | 0.22E+02 | 0.16E-06 | -60.0-7499.-8000. |
| 1142.4872 | 2 | 972-0.21E-01-0.20E+02 | 0.22E+02 | 0.16E-06 | -60.0-7512.-8000. |
| 1146.4506 | 3 | 975-0.21E-01-0.20E+02 | 0.22E+02 | 0.16E-06 | -60.0-7521.-8000. |
| 1151.8056 | 4 | 979-0.21E-01-0.20E+02 | 0.23E+02 | 0.16E-06 | -60.0-7509.-8000. |
| 1157.1605 | 5 | 984-0.20E-01-0.20E+02 | 0.23E+02 | 0.16E-06 | -60.0-7480.-8000. |

Time ItW ItCum vTop SvTop SvRoot SvBot hTop hRoot hBot

|           |   |                        |          |          |                   |
|-----------|---|------------------------|----------|----------|-------------------|
| 1162.5154 | 6 | 990-0.20E-01-0.20E+02  | 0.23E+02 | 0.16E-06 | -60.0-7466.-8000. |
| 1167.8704 | 3 | 993-0.20E-01-0.20E+02  | 0.23E+02 | 0.16E-06 | -60.0-7458.-8000. |
| 1174.2963 | 2 | 995-0.20E-01-0.21E+02  | 0.23E+02 | 0.16E-06 | -60.0-7453.-8000. |
| 1182.8642 | 8 | 1003-0.18E-01-0.21E+02 | 0.23E+02 | 0.16E-06 | -60.0-7422.-8000. |
| 1188.5761 | 5 | 1008-0.17E-01-0.21E+02 | 0.23E+02 | 0.16E-06 | -60.0-7389.-8000. |
| 1194.2881 | 8 | 1016-0.19E-01-0.21E+02 | 0.23E+02 | 0.16E-06 | -60.0-7407.-8000. |

|           |   |                        |          |          |                   |
|-----------|---|------------------------|----------|----------|-------------------|
| 1200.0000 | 5 | 1021-0.20E-01-0.21E+02 | 0.23E+02 | 0.16E-06 | -60.0-7419.-8000. |
| 1204.2668 | 2 | 1023-0.20E-01-0.21E+02 | 0.24E+02 | 0.16E-06 | -60.0-7425.-8000. |
| 1209.8136 | 7 | 1030-0.22E-01-0.21E+02 | 0.24E+02 | 0.16E-06 | -60.0-7472.-8000. |
| 1213.6964 | 7 | 1037-0.21E-01-0.21E+02 | 0.24E+02 | 0.17E-06 | -60.0-7464.-8000. |
| 1216.4143 | 5 | 1042-0.23E-01-0.21E+02 | 0.24E+02 | 0.17E-06 | -60.0-7482.-8000. |
| 1219.1323 | 5 | 1047-0.24E-01-0.21E+02 | 0.24E+02 | 0.17E-06 | -60.0-7518.-8000. |
| 1221.8502 | 3 | 1050-0.25E-01-0.22E+02 | 0.24E+02 | 0.17E-06 | -60.0-7542.-8000. |
| 1225.3835 | 4 | 1054-0.25E-01-0.22E+02 | 0.24E+02 | 0.17E-06 | -60.0-7559.-8000. |
| 1228.9168 | 6 | 1060-0.24E-01-0.22E+02 | 0.24E+02 | 0.17E-06 | -60.0-7550.-8000. |
| 1232.4502 | 3 | 1063-0.24E-01-0.22E+02 | 0.24E+02 | 0.17E-06 | -60.0-7545.-8000. |
| 1237.0435 | 3 | 1066-0.24E-01-0.22E+02 | 0.24E+02 | 0.17E-06 | -60.0-7541.-8000. |
| 1243.0148 | 8 | 1074-0.22E-01-0.22E+02 | 0.24E+02 | 0.17E-06 | -60.0-7508.-8000. |
| 1247.1947 | 3 | 1077-0.21E-01-0.22E+02 | 0.25E+02 | 0.17E-06 | -60.0-7481.-8000. |
| 1252.6286 | 8 | 1085-0.23E-01-0.22E+02 | 0.25E+02 | 0.16E-06 | -60.0-7496.-8000. |

| Time | ItW | ItCum | vTop | SvTop | SvRoot | SvBot | hTop | hRoot | hBot |
|------|-----|-------|------|-------|--------|-------|------|-------|------|
|------|-----|-------|------|-------|--------|-------|------|-------|------|

|           |   |                        |          |          |                   |
|-----------|---|------------------------|----------|----------|-------------------|
| 1256.4324 | 7 | 1092-0.21E-01-0.22E+02 | 0.25E+02 | 0.16E-06 | -60.0-7481.-8000. |
| 1259.0950 | 5 | 1097-0.23E-01-0.22E+02 | 0.25E+02 | 0.16E-06 | -60.0-7494.-8000. |
| 1261.7576 | 5 | 1102-0.24E-01-0.22E+02 | 0.25E+02 | 0.16E-06 | -60.0-7526.-8000. |
| 1264.4202 | 4 | 1106-0.25E-01-0.23E+02 | 0.25E+02 | 0.16E-06 | -60.0-7547.-8000. |
| 1267.0828 | 4 | 1110-0.25E-01-0.23E+02 | 0.25E+02 | 0.16E-06 | -60.0-7559.-8000. |
| 1269.7454 | 3 | 1113-0.25E-01-0.23E+02 | 0.25E+02 | 0.16E-06 | -60.0-7566.-8000. |
| 1273.2068 | 3 | 1116-0.25E-01-0.23E+02 | 0.25E+02 | 0.16E-06 | -60.0-7570.-8000. |
| 1277.7066 | 6 | 1122-0.24E-01-0.23E+02 | 0.25E+02 | 0.16E-06 | -60.0-7552.-8000. |
| 1282.2064 | 6 | 1128-0.23E-01-0.23E+02 | 0.25E+02 | 0.16E-06 | -60.0-7522.-8000. |
| 1286.7062 | 5 | 1133-0.23E-01-0.23E+02 | 0.25E+02 | 0.17E-06 | -60.0-7510.-8000. |
| 1291.2060 | 4 | 1137-0.23E-01-0.23E+02 | 0.26E+02 | 0.17E-06 | -60.0-7501.-8000. |
| 1295.7058 | 2 | 1139-0.23E-01-0.23E+02 | 0.26E+02 | 0.16E-06 | -60.0-7496.-8000. |
| 1301.5556 | 3 | 1142-0.22E-01-0.23E+02 | 0.26E+02 | 0.16E-06 | -60.0-7492.-8000. |
| 1309.1603 | 8 | 1150-0.19E-01-0.24E+02 | 0.26E+02 | 0.17E-06 | -60.0-7453.-8000. |
| 1314.4835 | 2 | 1152-0.18E-01-0.24E+02 | 0.26E+02 | 0.17E-06 | -60.0-7421.-8000. |
| 1321.4038 | 9 | 1161-0.20E-01-0.24E+02 | 0.26E+02 | 0.17E-06 | -60.0-7438.-8000. |
| 1326.2480 | 8 | 1169-0.19E-01-0.24E+02 | 0.26E+02 | 0.17E-06 | -60.0-7422.-8000. |
| 1329.6389 | 6 | 1175-0.21E-01-0.24E+02 | 0.26E+02 | 0.17E-06 | -60.0-7437.-8000. |
| 1333.0298 | 4 | 1179-0.23E-01-0.24E+02 | 0.26E+02 | 0.17E-06 | -60.0-7481.-8000. |
| 1336.4208 | 7 | 1186-0.24E-01-0.24E+02 | 0.26E+02 | 0.17E-06 | -60.0-7511.-8000. |

| Time | ItW | ItCum | vTop | SvTop | SvRoot | SvBot | hTop | hRoot | hBot |
|------|-----|-------|------|-------|--------|-------|------|-------|------|
|------|-----|-------|------|-------|--------|-------|------|-------|------|

|           |   |                        |          |          |                   |
|-----------|---|------------------------|----------|----------|-------------------|
| 1338.7944 | 3 | 1189-0.24E-01-0.24E+02 | 0.27E+02 | 0.17E-06 | -60.0-7522.-8000. |
| 1341.8801 | 4 | 1193-0.25E-01-0.24E+02 | 0.27E+02 | 0.17E-06 | -60.0-7557.-8000. |
| 1344.9659 | 5 | 1198-0.25E-01-0.24E+02 | 0.27E+02 | 0.17E-06 | -60.0-7557.-8000. |
| 1348.0516 | 3 | 1201-0.25E-01-0.24E+02 | 0.27E+02 | 0.16E-06 | -60.0-7558.-8000. |
| 1352.0631 | 3 | 1204-0.25E-01-0.24E+02 | 0.27E+02 | 0.17E-06 | -60.0-7557.-8000. |
| 1357.2780 | 8 | 1212-0.23E-01-0.25E+02 | 0.27E+02 | 0.16E-06 | -60.0-7532.-8000. |
| 1360.9284 | 6 | 1218-0.22E-01-0.25E+02 | 0.27E+02 | 0.16E-06 | -60.0-7507.-8000. |
| 1364.5789 | 7 | 1225-0.24E-01-0.25E+02 | 0.27E+02 | 0.17E-06 | -60.0-7518.-8000. |



|           |   |                        |          |          |                   |
|-----------|---|------------------------|----------|----------|-------------------|
| 1367.1342 | 6 | 1231-0.24E-01-0.25E+02 | 0.27E+02 | 0.17E-06 | -60.0-7523.-8000. |
| 1369.6895 | 3 | 1234-0.24E-01-0.25E+02 | 0.27E+02 | 0.17E-06 | -60.0-7545.-8000. |
| 1373.0114 | 4 | 1238-0.25E-01-0.25E+02 | 0.27E+02 | 0.17E-06 | -60.0-7563.-8000. |
| 1376.3333 | 5 | 1243-0.25E-01-0.25E+02 | 0.27E+02 | 0.17E-06 | -60.0-7556.-8000. |
| 1379.6552 | 3 | 1246-0.24E-01-0.25E+02 | 0.28E+02 | 0.17E-06 | -60.0-7553.-8000. |
| 1383.9736 | 3 | 1249-0.24E-01-0.25E+02 | 0.28E+02 | 0.17E-06 | -60.0-7549.-8000. |
| 1389.5763 | 7 | 1256-0.23E-01-0.25E+02 | 0.28E+02 | 0.17E-06 | -60.0-7519.-8000. |
| 1393.5061 | 5 | 1261-0.21E-01-0.25E+02 | 0.28E+02 | 0.17E-06 | -60.0-7492.-8000. |
| 1397.4359 | 7 | 1268-0.23E-01-0.26E+02 | 0.28E+02 | 0.17E-06 | -60.0-7504.-8000. |
| 1400.1867 | 4 | 1272-0.24E-01-0.26E+02 | 0.28E+02 | 0.17E-06 | -60.0-7509.-8000. |
| 1402.9376 | 4 | 1276-0.24E-01-0.26E+02 | 0.28E+02 | 0.17E-06 | -60.0-7535.-8000. |
| 1405.6884 | 4 | 1280-0.25E-01-0.26E+02 | 0.28E+02 | 0.17E-06 | -60.0-7550.-8000. |

Time ItW ItCum vTop SvTop SvRoot SvBot hTop hRoot hBot

|           |   |                        |          |          |                   |
|-----------|---|------------------------|----------|----------|-------------------|
| 1408.4393 | 3 | 1283-0.25E-01-0.26E+02 | 0.28E+02 | 0.17E-06 | -60.0-7559.-8000. |
| 1411.9460 | 3 | 1286-0.25E-01-0.26E+02 | 0.28E+02 | 0.17E-06 | -60.0-7565.-8000. |
| 1416.6217 | 6 | 1292-0.24E-01-0.26E+02 | 0.28E+02 | 0.17E-06 | -60.0-7549.-8000. |
| 1421.2974 | 6 | 1298-0.23E-01-0.26E+02 | 0.28E+02 | 0.17E-06 | -60.0-7517.-8000. |
| 1425.9730 | 7 | 1305-0.22E-01-0.26E+02 | 0.29E+02 | 0.17E-06 | -60.0-7501.-8000. |
| 1429.4798 | 3 | 1308-0.22E-01-0.26E+02 | 0.29E+02 | 0.17E-06 | -60.0-7494.-8000. |
| 1434.7399 | 8 | 1316-0.24E-01-0.26E+02 | 0.29E+02 | 0.17E-06 | -60.0-7526.-8000. |
| 1437.3699 | 7 | 1323-0.22E-01-0.26E+02 | 0.29E+02 | 0.17E-06 | -60.0-7511.-8000. |
| 1440.0000 | 7 | 1330-0.24E-01-0.27E+02 | 0.29E+02 | 0.17E-06 | -60.0-7535.-8000. |
| 1441.4511 | 3 | 1333-0.24E-01-0.27E+02 | 0.29E+02 | 0.17E-06 | -60.0-7544.-8000. |
| 1443.3375 | 3 | 1336-0.25E-01-0.27E+02 | 0.29E+02 | 0.17E-06 | -60.0-7573.-8000. |
| 1445.9203 | 3 | 1339-0.25E-01-0.27E+02 | 0.29E+02 | 0.17E-06 | -60.0-7585.-8000. |
| 1448.9336 | 3 | 1342-0.25E-01-0.27E+02 | 0.29E+02 | 0.17E-06 | -60.0-7578.-8000. |
| 1452.7002 | 4 | 1346-0.25E-01-0.27E+02 | 0.29E+02 | 0.17E-06 | -60.0-7567.-8000. |
| 1456.4668 | 6 | 1352-0.24E-01-0.27E+02 | 0.29E+02 | 0.17E-06 | -60.0-7549.-8000. |
| 1460.2334 | 4 | 1356-0.24E-01-0.27E+02 | 0.29E+02 | 0.17E-06 | -60.0-7539.-8000. |
| 1464.0000 | 3 | 1359-0.24E-01-0.27E+02 | 0.29E+02 | 0.17E-06 | -60.0-7534.-8000. |
| 1469.3877 | 3 | 1362-0.23E-01-0.27E+02 | 0.30E+02 | 0.17E-06 | -60.0-7529.-8000. |
| 1476.3918 | 9 | 1371-0.20E-01-0.27E+02 | 0.30E+02 | 0.17E-06 | -60.0-7479.-8000. |
| 1481.2947 | 6 | 1377-0.19E-01-0.27E+02 | 0.30E+02 | 0.17E-06 | -60.0-7447.-8000. |

Time ItW ItCum vTop SvTop SvRoot SvBot hTop hRoot hBot

|           |   |                        |          |          |                   |
|-----------|---|------------------------|----------|----------|-------------------|
| 1486.1975 | 8 | 1385-0.20E-01-0.28E+02 | 0.30E+02 | 0.17E-06 | -60.0-7455.-8000. |
| 1489.6295 | 4 | 1389-0.21E-01-0.28E+02 | 0.30E+02 | 0.17E-06 | -60.0-7459.-8000. |
| 1493.0615 | 4 | 1393-0.21E-01-0.28E+02 | 0.30E+02 | 0.17E-06 | -60.0-7486.-8000. |
| 1496.4935 | 3 | 1396-0.21E-01-0.28E+02 | 0.30E+02 | 0.17E-06 | -60.0-7502.-8000. |
| 1500.9551 | 2 | 1398-0.21E-01-0.28E+02 | 0.30E+02 | 0.17E-06 | -60.0-7515.-8000. |
| 1506.7552 | 7 | 1405-0.21E-01-0.28E+02 | 0.30E+02 | 0.17E-06 | -60.0-7499.-8000. |
| 1510.8152 | 5 | 1410-0.20E-01-0.28E+02 | 0.30E+02 | 0.17E-06 | -60.0-7476.-8000. |
| 1514.8753 | 7 | 1417-0.21E-01-0.28E+02 | 0.30E+02 | 0.17E-06 | -60.0-7486.-8000. |
| 1517.7173 | 3 | 1420-0.21E-01-0.28E+02 | 0.31E+02 | 0.17E-06 | -60.0-7491.-8000. |
| 1521.4119 | 4 | 1424-0.21E-01-0.28E+02 | 0.31E+02 | 0.17E-06 | -60.0-7518.-8000. |

|           |   |                        |          |          |                   |
|-----------|---|------------------------|----------|----------|-------------------|
| 1525.1066 | 4 | 1428-0.22E-01-0.28E+02 | 0.31E+02 | 0.17E-06 | -60.0-7516.-8000. |
| 1528.8012 | 3 | 1431-0.22E-01-0.28E+02 | 0.31E+02 | 0.17E-06 | -60.0-7516.-8000. |
| 1533.6043 | 2 | 1433-0.22E-01-0.29E+02 | 0.31E+02 | 0.17E-06 | -60.0-7515.-8000. |
| 1539.8482 | 7 | 1440-0.21E-01-0.29E+02 | 0.31E+02 | 0.17E-06 | -60.0-7489.-8000. |
| 1544.2190 | 5 | 1445-0.20E-01-0.29E+02 | 0.31E+02 | 0.17E-06 | -60.0-7462.-8000. |
| 1548.5898 | 7 | 1452-0.21E-01-0.29E+02 | 0.31E+02 | 0.17E-06 | -60.0-7474.-8000. |
| 1551.6493 | 4 | 1456-0.21E-01-0.29E+02 | 0.31E+02 | 0.17E-06 | -60.0-7479.-8000. |
| 1554.7088 | 4 | 1460-0.21E-01-0.29E+02 | 0.31E+02 | 0.17E-06 | -60.0-7502.-8000. |
| 1557.7684 | 3 | 1463-0.22E-01-0.29E+02 | 0.31E+02 | 0.17E-06 | -60.0-7515.-8000. |
| 1561.7458 | 2 | 1465-0.22E-01-0.29E+02 | 0.31E+02 | 0.17E-06 | -60.0-7526.-8000. |

Time ItW ItCum vTop SvTop SvRoot SvBot hTop hRoot hBot

|           |   |                        |          |          |                   |
|-----------|---|------------------------|----------|----------|-------------------|
| 1566.9164 | 6 | 1471-0.21E-01-0.29E+02 | 0.32E+02 | 0.17E-06 | -60.0-7513.-8000. |
| 1572.0870 | 6 | 1477-0.21E-01-0.29E+02 | 0.32E+02 | 0.17E-06 | -60.0-7486.-8000. |
| 1577.2576 | 5 | 1482-0.21E-01-0.30E+02 | 0.32E+02 | 0.17E-06 | -60.0-7474.-8000. |
| 1582.4282 | 4 | 1486-0.21E-01-0.30E+02 | 0.32E+02 | 0.18E-06 | -60.0-7466.-8000. |
| 1587.5988 | 2 | 1488-0.21E-01-0.30E+02 | 0.32E+02 | 0.18E-06 | -60.0-7462.-8000. |
| 1594.3206 | 2 | 1490-0.20E-01-0.30E+02 | 0.32E+02 | 0.18E-06 | -60.0-7458.-8000. |
| 1603.0590 | 8 | 1498-0.18E-01-0.30E+02 | 0.32E+02 | 0.18E-06 | -60.0-7417.-8000. |
| 1609.1758 | 3 | 1501-0.17E-01-0.30E+02 | 0.32E+02 | 0.18E-06 | -60.0-7383.-8000. |
| 1617.1277 | 9 | 1510-0.19E-01-0.30E+02 | 0.32E+02 | 0.18E-06 | -60.0-7401.-8000. |
| 1622.6940 | 8 | 1518-0.18E-01-0.30E+02 | 0.33E+02 | 0.18E-06 | -60.0-7384.-8000. |
| 1626.5904 | 5 | 1523-0.19E-01-0.30E+02 | 0.33E+02 | 0.18E-06 | -60.0-7400.-8000. |
| 1630.4869 | 5 | 1528-0.21E-01-0.31E+02 | 0.33E+02 | 0.18E-06 | -60.0-7443.-8000. |
| 1634.3833 | 6 | 1534-0.21E-01-0.31E+02 | 0.33E+02 | 0.19E-06 | -60.0-7472.-8000. |
| 1638.2797 | 4 | 1538-0.21E-01-0.31E+02 | 0.33E+02 | 0.19E-06 | -60.0-7489.-8000. |
| 1642.1761 | 2 | 1540-0.21E-01-0.31E+02 | 0.33E+02 | 0.19E-06 | -60.0-7499.-8000. |
| 1647.2415 | 3 | 1543-0.21E-01-0.31E+02 | 0.33E+02 | 0.19E-06 | -60.0-7504.-8000. |
| 1653.5480 | 6 | 1549-0.21E-01-0.31E+02 | 0.33E+02 | 0.19E-06 | -60.0-7479.-8000. |
| 1659.8545 | 6 | 1555-0.19E-01-0.31E+02 | 0.33E+02 | 0.20E-06 | -60.0-7445.-8000. |
| 1666.1610 | 7 | 1562-0.19E-01-0.31E+02 | 0.33E+02 | 0.20E-06 | -60.0-7428.-8000. |
| 1670.8909 | 3 | 1565-0.19E-01-0.31E+02 | 0.34E+02 | 0.20E-06 | -60.0-7421.-8000. |

Time ItW ItCum vTop SvTop SvRoot SvBot hTop hRoot hBot

|           |   |                        |          |          |                   |
|-----------|---|------------------------|----------|----------|-------------------|
| 1676.4091 | 5 | 1570-0.20E-01-0.31E+02 | 0.34E+02 | 0.20E-06 | -60.0-7450.-8000. |
| 1681.9272 | 8 | 1578-0.20E-01-0.32E+02 | 0.34E+02 | 0.21E-06 | -60.0-7449.-8000. |
| 1686.3418 | 3 | 1581-0.20E-01-0.32E+02 | 0.34E+02 | 0.21E-06 | -60.0-7446.-8000. |
| 1692.2279 | 5 | 1586-0.21E-01-0.32E+02 | 0.34E+02 | 0.21E-06 | -60.0-7473.-8000. |
| 1698.1139 | 8 | 1594-0.20E-01-0.32E+02 | 0.34E+02 | 0.21E-06 | -60.0-7453.-8000. |
| 1701.0570 | 3 | 1597-0.20E-01-0.32E+02 | 0.34E+02 | 0.21E-06 | -60.0-7447.-8000. |
| 1704.0000 | 6 | 1603-0.21E-01-0.32E+02 | 0.34E+02 | 0.21E-06 | -60.0-7479.-8000. |
| 1707.8171 | 4 | 1607-0.21E-01-0.32E+02 | 0.34E+02 | 0.22E-06 | -60.0-7511.-8000. |
| 1711.6342 | 3 | 1610-0.21E-01-0.32E+02 | 0.34E+02 | 0.22E-06 | -60.0-7510.-8000. |
| 1716.5964 | 3 | 1613-0.21E-01-0.32E+02 | 0.35E+02 | 0.22E-06 | -60.0-7511.-8000. |
| 1723.0473 | 7 | 1620-0.21E-01-0.32E+02 | 0.35E+02 | 0.22E-06 | -60.0-7483.-8000. |
| 1727.5630 | 5 | 1625-0.19E-01-0.32E+02 | 0.35E+02 | 0.22E-06 | -60.0-7456.-8000. |

|           |   |                        |          |          |                   |
|-----------|---|------------------------|----------|----------|-------------------|
| 1732.0786 | 7 | 1632-0.21E-01-0.33E+02 | 0.35E+02 | 0.23E-06 | -60.0-7468.-8000. |
| 1735.2395 | 4 | 1636-0.21E-01-0.33E+02 | 0.35E+02 | 0.23E-06 | -60.0-7473.-8000. |
| 1738.4005 | 4 | 1640-0.21E-01-0.33E+02 | 0.35E+02 | 0.23E-06 | -60.0-7498.-8000. |
| 1741.5614 | 3 | 1643-0.22E-01-0.33E+02 | 0.35E+02 | 0.23E-06 | -60.0-7512.-8000. |
| 1745.6706 | 2 | 1645-0.22E-01-0.33E+02 | 0.35E+02 | 0.23E-06 | -60.0-7523.-8000. |
| 1751.0126 | 7 | 1652-0.21E-01-0.33E+02 | 0.35E+02 | 0.23E-06 | -60.0-7510.-8000. |
| 1754.7520 | 4 | 1656-0.21E-01-0.33E+02 | 0.35E+02 | 0.23E-06 | -60.0-7490.-8000. |
| 1758.4914 | 7 | 1663-0.21E-01-0.33E+02 | 0.35E+02 | 0.24E-06 | -60.0-7499.-8000. |

Time ItW ItCum vTop SvTop SvRoot SvBot hTop hRoot hBot

|           |   |                        |          |          |                   |
|-----------|---|------------------------|----------|----------|-------------------|
| 1761.1090 | 3 | 1666-0.21E-01-0.33E+02 | 0.35E+02 | 0.24E-06 | -60.0-7504.-8000. |
| 1764.5118 | 3 | 1669-0.21E-01-0.33E+02 | 0.36E+02 | 0.24E-06 | -60.0-7526.-8000. |
| 1768.9355 | 5 | 1674-0.22E-01-0.33E+02 | 0.36E+02 | 0.24E-06 | -60.0-7524.-8000. |
| 1773.3592 | 6 | 1680-0.21E-01-0.33E+02 | 0.36E+02 | 0.25E-06 | -60.0-7507.-8000. |
| 1777.7829 | 4 | 1684-0.21E-01-0.34E+02 | 0.36E+02 | 0.25E-06 | -60.0-7499.-8000. |
| 1782.2066 | 2 | 1686-0.21E-01-0.34E+02 | 0.36E+02 | 0.25E-06 | -60.0-7494.-8000. |
| 1787.9574 | 2 | 1688-0.21E-01-0.34E+02 | 0.36E+02 | 0.25E-06 | -60.0-7489.-8000. |
| 1795.4335 | 8 | 1696-0.20E-01-0.34E+02 | 0.36E+02 | 0.25E-06 | -60.0-7455.-8000. |
| 1800.6667 | 4 | 1700-0.18E-01-0.34E+02 | 0.36E+02 | 0.26E-06 | -60.0-7424.-8000. |
| 1805.9000 | 8 | 1708-0.20E-01-0.34E+02 | 0.36E+02 | 0.26E-06 | -60.0-7436.-8000. |
| 1809.5632 | 4 | 1712-0.20E-01-0.34E+02 | 0.36E+02 | 0.26E-06 | -60.0-7442.-8000. |
| 1813.2265 | 4 | 1716-0.21E-01-0.34E+02 | 0.37E+02 | 0.26E-06 | -60.0-7473.-8000. |
| 1816.8898 | 4 | 1720-0.21E-01-0.34E+02 | 0.37E+02 | 0.26E-06 | -60.0-7492.-8000. |
| 1820.5530 | 2 | 1722-0.21E-01-0.34E+02 | 0.37E+02 | 0.26E-06 | -60.0-7504.-8000. |
| 1825.3153 | 3 | 1725-0.22E-01-0.35E+02 | 0.37E+02 | 0.27E-06 | -60.0-7511.-8000. |
| 1831.5062 | 7 | 1732-0.21E-01-0.35E+02 | 0.37E+02 | 0.27E-06 | -60.0-7489.-8000. |
| 1835.8399 | 6 | 1738-0.20E-01-0.35E+02 | 0.37E+02 | 0.27E-06 | -60.0-7464.-8000. |
| 1840.1735 | 7 | 1745-0.21E-01-0.35E+02 | 0.37E+02 | 0.27E-06 | -60.0-7475.-8000. |
| 1843.2070 | 4 | 1749-0.21E-01-0.35E+02 | 0.37E+02 | 0.28E-06 | -60.0-7480.-8000. |
| 1846.2406 | 4 | 1753-0.21E-01-0.35E+02 | 0.37E+02 | 0.28E-06 | -60.0-7503.-8000. |

Time ItW ItCum vTop SvTop SvRoot SvBot hTop hRoot hBot

|           |   |                        |          |          |                   |
|-----------|---|------------------------|----------|----------|-------------------|
| 1849.2741 | 3 | 1756-0.22E-01-0.35E+02 | 0.37E+02 | 0.28E-06 | -60.0-7516.-8000. |
| 1853.2178 | 2 | 1758-0.22E-01-0.35E+02 | 0.37E+02 | 0.28E-06 | -60.0-7527.-8000. |
| 1858.3445 | 5 | 1763-0.21E-01-0.35E+02 | 0.37E+02 | 0.28E-06 | -60.0-7514.-8000. |
| 1863.4712 | 6 | 1769-0.21E-01-0.35E+02 | 0.38E+02 | 0.28E-06 | -60.0-7487.-8000. |
| 1868.5979 | 5 | 1774-0.21E-01-0.35E+02 | 0.38E+02 | 0.28E-06 | -60.0-7475.-8000. |
| 1873.7246 | 3 | 1777-0.21E-01-0.36E+02 | 0.38E+02 | 0.29E-06 | -60.0-7467.-8000. |
| 1880.3893 | 2 | 1779-0.20E-01-0.36E+02 | 0.38E+02 | 0.29E-06 | -60.0-7462.-8000. |
| 1889.4765 | 8 | 1787-0.18E-01-0.36E+02 | 0.38E+02 | 0.29E-06 | -60.0-7417.-8000. |
| 1895.5347 | 3 | 1790-0.17E-01-0.36E+02 | 0.38E+02 | 0.29E-06 | -60.0-7381.-8000. |
| 1903.6122 | 9 | 1799-0.19E-01-0.36E+02 | 0.38E+02 | 0.30E-06 | -60.0-7403.-8000. |
| 1909.3819 | 8 | 1807-0.17E-01-0.36E+02 | 0.38E+02 | 0.30E-06 | -60.0-7383.-8000. |
| 1913.2284 | 5 | 1812-0.19E-01-0.36E+02 | 0.38E+02 | 0.30E-06 | -60.0-7396.-8000. |
| 1917.0748 | 4 | 1816-0.21E-01-0.36E+02 | 0.39E+02 | 0.30E-06 | -60.0-7442.-8000. |
| 1920.9213 | 6 | 1822-0.21E-01-0.36E+02 | 0.39E+02 | 0.30E-06 | -60.0-7472.-8000. |

|           |   |                        |          |          |                   |
|-----------|---|------------------------|----------|----------|-------------------|
| 1924.7677 | 4 | 1826-0.21E-01-0.37E+02 | 0.39E+02 | 0.31E-06 | -60.0-7490.-8000. |
| 1928.6142 | 2 | 1828-0.21E-01-0.37E+02 | 0.39E+02 | 0.31E-06 | -60.0-7500.-8000. |
| 1933.7428 | 3 | 1831-0.21E-01-0.37E+02 | 0.39E+02 | 0.31E-06 | -60.0-7506.-8000. |
| 1938.8714 | 6 | 1837-0.21E-01-0.37E+02 | 0.39E+02 | 0.31E-06 | -60.0-7484.-8000. |
| 1944.0000 | 5 | 1842-0.21E-01-0.37E+02 | 0.39E+02 | 0.32E-06 | -60.0-7473.-8000. |
| 1950.5290 | 4 | 1846-0.20E-01-0.37E+02 | 0.39E+02 | 0.32E-06 | -60.0-7465.-8000. |

| Time | ItW | ItCum | vTop | SvTop | SvRoot | SvBot | hTop | hRoot | hBot |
|------|-----|-------|------|-------|--------|-------|------|-------|------|
|------|-----|-------|------|-------|--------|-------|------|-------|------|

|           |   |                        |          |          |                   |
|-----------|---|------------------------|----------|----------|-------------------|
| 1957.0581 | 8 | 1854-0.19E-01-0.37E+02 | 0.39E+02 | 0.32E-06 | -60.0-7435.-8000. |
| 1961.6284 | 4 | 1858-0.19E-01-0.37E+02 | 0.39E+02 | 0.32E-06 | -60.0-7423.-8000. |
| 1966.1987 | 5 | 1863-0.21E-01-0.37E+02 | 0.40E+02 | 0.32E-06 | -60.0-7449.-8000. |
| 1970.7690 | 6 | 1869-0.21E-01-0.37E+02 | 0.40E+02 | 0.33E-06 | -60.0-7465.-8000. |
| 1975.3393 | 4 | 1873-0.21E-01-0.38E+02 | 0.40E+02 | 0.33E-06 | -60.0-7474.-8000. |
| 1979.9097 | 2 | 1875-0.21E-01-0.38E+02 | 0.40E+02 | 0.33E-06 | -60.0-7478.-8000. |
| 1985.8511 | 3 | 1878-0.21E-01-0.38E+02 | 0.40E+02 | 0.33E-06 | -60.0-7480.-8000. |
| 1993.5749 | 8 | 1886-0.19E-01-0.38E+02 | 0.40E+02 | 0.34E-06 | -60.0-7446.-8000. |
| 1998.9816 | 4 | 1890-0.18E-01-0.38E+02 | 0.40E+02 | 0.34E-06 | -60.0-7415.-8000. |
| 2004.3883 | 8 | 1898-0.20E-01-0.38E+02 | 0.40E+02 | 0.34E-06 | -60.0-7428.-8000. |
| 2008.1730 | 4 | 1902-0.20E-01-0.38E+02 | 0.40E+02 | 0.34E-06 | -60.0-7434.-8000. |
| 2011.9577 | 4 | 1906-0.21E-01-0.38E+02 | 0.40E+02 | 0.35E-06 | -60.0-7468.-8000. |
| 2015.7424 | 4 | 1910-0.21E-01-0.38E+02 | 0.41E+02 | 0.35E-06 | -60.0-7488.-8000. |
| 2019.5270 | 3 | 1913-0.22E-01-0.38E+02 | 0.41E+02 | 0.35E-06 | -60.0-7501.-8000. |
| 2024.4471 | 3 | 1916-0.22E-01-0.39E+02 | 0.41E+02 | 0.35E-06 | -60.0-7508.-8000. |
| 2030.8432 | 7 | 1923-0.21E-01-0.39E+02 | 0.41E+02 | 0.35E-06 | -60.0-7484.-8000. |
| 2035.3205 | 5 | 1928-0.20E-01-0.39E+02 | 0.41E+02 | 0.36E-06 | -60.0-7457.-8000. |
| 2039.7978 | 7 | 1935-0.21E-01-0.39E+02 | 0.41E+02 | 0.36E-06 | -60.0-7470.-8000. |
| 2042.9319 | 4 | 1939-0.21E-01-0.39E+02 | 0.41E+02 | 0.36E-06 | -60.0-7475.-8000. |
| 2046.0660 | 4 | 1943-0.21E-01-0.39E+02 | 0.41E+02 | 0.36E-06 | -60.0-7500.-8000. |

| Time | ItW | ItCum | vTop | SvTop | SvRoot | SvBot | hTop | hRoot | hBot |
|------|-----|-------|------|-------|--------|-------|------|-------|------|
|------|-----|-------|------|-------|--------|-------|------|-------|------|

|           |   |                        |          |          |                   |
|-----------|---|------------------------|----------|----------|-------------------|
| 2049.2001 | 3 | 1946-0.22E-01-0.39E+02 | 0.41E+02 | 0.36E-06 | -60.0-7514.-8000. |
| 2053.2744 | 2 | 1948-0.22E-01-0.39E+02 | 0.41E+02 | 0.37E-06 | -60.0-7525.-8000. |
| 2058.5710 | 6 | 1954-0.22E-01-0.39E+02 | 0.41E+02 | 0.37E-06 | -60.0-7512.-8000. |
| 2063.8676 | 6 | 1960-0.21E-01-0.39E+02 | 0.42E+02 | 0.37E-06 | -60.0-7483.-8000. |
| 2069.1643 | 5 | 1965-0.21E-01-0.39E+02 | 0.42E+02 | 0.38E-06 | -60.0-7470.-8000. |
| 2074.4609 | 4 | 1969-0.21E-01-0.40E+02 | 0.42E+02 | 0.38E-06 | -60.0-7462.-8000. |
| 2079.7575 | 2 | 1971-0.21E-01-0.40E+02 | 0.42E+02 | 0.38E-06 | -60.0-7458.-8000. |
| 2086.6431 | 2 | 1973-0.20E-01-0.40E+02 | 0.42E+02 | 0.38E-06 | -60.0-7454.-8000. |
| 2095.8127 | 9 | 1982-0.18E-01-0.40E+02 | 0.42E+02 | 0.39E-06 | -60.0-7410.-8000. |
| 2102.2315 | 3 | 1985-0.17E-01-0.40E+02 | 0.42E+02 | 0.39E-06 | -60.0-7373.-8000. |
| 2110.4841 | 9 | 1994-0.18E-01-0.40E+02 | 0.42E+02 | 0.39E-06 | -60.0-7389.-8000. |
| 2115.9859 | 8 | 2002-0.17E-01-0.40E+02 | 0.42E+02 | 0.39E-06 | -60.0-7373.-8000. |
| 2119.9773 | 6 | 2008-0.20E-01-0.40E+02 | 0.43E+02 | 0.39E-06 | -60.0-7393.-8000. |
| 2123.9795 | 5 | 2013-0.21E-01-0.41E+02 | 0.43E+02 | 0.39E-06 | -60.0-7439.-8000. |
| 2127.9818 | 6 | 2019-0.21E-01-0.41E+02 | 0.43E+02 | 0.39E-06 | -60.0-7469.-8000. |
| 2131.9841 | 4 | 2023-0.21E-01-0.41E+02 | 0.43E+02 | 0.39E-06 | -60.0-7486.-8000. |

|           |   |                        |          |          |                   |
|-----------|---|------------------------|----------|----------|-------------------|
| 2135.9864 | 2 | 2025-0.21E-01-0.41E+02 | 0.43E+02 | 0.39E-06 | -60.0-7496.-8000. |
| 2140.7891 | 3 | 2028-0.22E-01-0.41E+02 | 0.43E+02 | 0.39E-06 | -60.0-7501.-8000. |
| 2147.1927 | 7 | 2035-0.21E-01-0.41E+02 | 0.43E+02 | 0.39E-06 | -60.0-7484.-8000. |
| 2151.4618 | 6 | 2041-0.19E-01-0.41E+02 | 0.43E+02 | 0.39E-06 | -60.0-7459.-8000. |

Time ItW ItCum vTop SvTop SvRoot SvBot hTop hRoot hBot

|           |   |                        |          |          |                   |
|-----------|---|------------------------|----------|----------|-------------------|
| 2155.7309 | 7 | 2048-0.21E-01-0.41E+02 | 0.43E+02 | 0.39E-06 | -60.0-7474.-8000. |
| 2160.0000 | 6 | 2054-0.21E-01-0.41E+02 | 0.43E+02 | 0.39E-06 | -60.0-7484.-8000. |
| 2163.4286 | 4 | 2058-0.21E-01-0.41E+02 | 0.44E+02 | 0.39E-06 | -60.0-7488.-8000. |
| 2166.8571 | 3 | 2061-0.22E-01-0.41E+02 | 0.44E+02 | 0.39E-06 | -60.0-7505.-8000. |
| 2171.1429 | 4 | 2065-0.22E-01-0.42E+02 | 0.44E+02 | 0.39E-06 | -60.0-7516.-8000. |
| 2175.4286 | 4 | 2069-0.22E-01-0.42E+02 | 0.44E+02 | 0.39E-06 | -60.0-7506.-8000. |
| 2179.7143 | 5 | 2074-0.21E-01-0.42E+02 | 0.44E+02 | 0.39E-06 | -60.0-7502.-8000. |
| 2184.0000 | 2 | 2076-0.21E-01-0.42E+02 | 0.44E+02 | 0.39E-06 | -60.0-7499.-8000. |
| 2189.5859 | 2 | 2078-0.22E-01-0.42E+02 | 0.44E+02 | 0.39E-06 | -60.0-7495.-8000. |
| 2196.8475 | 8 | 2086-0.20E-01-0.42E+02 | 0.44E+02 | 0.39E-06 | -60.0-7461.-8000. |
| 2201.9307 | 4 | 2090-0.19E-01-0.42E+02 | 0.44E+02 | 0.39E-06 | -60.0-7431.-8000. |
| 2207.0139 | 8 | 2098-0.20E-01-0.42E+02 | 0.44E+02 | 0.39E-06 | -60.0-7443.-8000. |
| 2210.5721 | 4 | 2102-0.21E-01-0.42E+02 | 0.44E+02 | 0.39E-06 | -60.0-7449.-8000. |
| 2214.1303 | 4 | 2106-0.21E-01-0.42E+02 | 0.45E+02 | 0.39E-06 | -60.0-7479.-8000. |
| 2217.6885 | 4 | 2110-0.22E-01-0.42E+02 | 0.45E+02 | 0.39E-06 | -60.0-7498.-8000. |
| 2221.2467 | 2 | 2112-0.22E-01-0.43E+02 | 0.45E+02 | 0.39E-06 | -60.0-7509.-8000. |
| 2225.8724 | 5 | 2117-0.22E-01-0.43E+02 | 0.45E+02 | 0.39E-06 | -60.0-7517.-8000. |
| 2230.4981 | 7 | 2124-0.21E-01-0.43E+02 | 0.45E+02 | 0.39E-06 | -60.0-7501.-8000. |
| 2233.7360 | 4 | 2128-0.21E-01-0.43E+02 | 0.45E+02 | 0.39E-06 | -60.0-7495.-8000. |
| 2236.9740 | 4 | 2132-0.21E-01-0.43E+02 | 0.45E+02 | 0.39E-06 | -60.0-7510.-8000. |

Time ItW ItCum vTop SvTop SvRoot SvBot hTop hRoot hBot

|           |   |                        |          |          |                   |
|-----------|---|------------------------|----------|----------|-------------------|
| 2240.2120 | 3 | 2135-0.22E-01-0.43E+02 | 0.45E+02 | 0.39E-06 | -60.0-7518.-8000. |
| 2244.4214 | 2 | 2137-0.22E-01-0.43E+02 | 0.45E+02 | 0.39E-06 | -60.0-7525.-8000. |
| 2249.8935 | 7 | 2144-0.21E-01-0.43E+02 | 0.45E+02 | 0.39E-06 | -60.0-7510.-8000. |
| 2253.7240 | 4 | 2148-0.21E-01-0.43E+02 | 0.45E+02 | 0.39E-06 | -60.0-7488.-8000. |
| 2257.5546 | 7 | 2155-0.21E-01-0.43E+02 | 0.45E+02 | 0.39E-06 | -60.0-7497.-8000. |
| 2260.2359 | 3 | 2158-0.21E-01-0.43E+02 | 0.46E+02 | 0.39E-06 | -60.0-7502.-8000. |
| 2263.7217 | 4 | 2162-0.22E-01-0.43E+02 | 0.46E+02 | 0.39E-06 | -60.0-7526.-8000. |
| 2267.2075 | 5 | 2167-0.22E-01-0.44E+02 | 0.46E+02 | 0.39E-06 | -60.0-7524.-8000. |
| 2270.6933 | 4 | 2171-0.22E-01-0.44E+02 | 0.46E+02 | 0.39E-06 | -60.0-7524.-8000. |
| 2274.1790 | 2 | 2173-0.22E-01-0.44E+02 | 0.46E+02 | 0.39E-06 | -60.0-7524.-8000. |
| 2278.7105 | 3 | 2176-0.22E-01-0.44E+02 | 0.46E+02 | 0.39E-06 | -60.0-7523.-8000. |
| 2284.6015 | 7 | 2183-0.21E-01-0.44E+02 | 0.46E+02 | 0.39E-06 | -60.0-7500.-8000. |
| 2288.7252 | 5 | 2188-0.20E-01-0.44E+02 | 0.46E+02 | 0.39E-06 | -60.0-7475.-8000. |
| 2292.8488 | 7 | 2195-0.21E-01-0.44E+02 | 0.46E+02 | 0.39E-06 | -60.0-7485.-8000. |
| 2295.7354 | 3 | 2198-0.21E-01-0.44E+02 | 0.46E+02 | 0.39E-06 | -60.0-7490.-8000. |
| 2299.4880 | 4 | 2202-0.22E-01-0.44E+02 | 0.46E+02 | 0.39E-06 | -60.0-7519.-8000. |
| 2303.2405 | 5 | 2207-0.22E-01-0.44E+02 | 0.46E+02 | 0.39E-06 | -60.0-7516.-8000. |
| 2306.9930 | 3 | 2210-0.22E-01-0.44E+02 | 0.47E+02 | 0.39E-06 | -60.0-7516.-8000. |

2311.8713 2 2212-0.22E-01-0.44E+02 0.47E+02 0.39E-06 -60.0-7514.-8000.  
2318.2131 7 2219-0.21E-01-0.45E+02 0.47E+02 0.39E-06 -60.0-7487.-8000.

Time ItW ItCum vTop SvTop SvRoot SvBot hTop hRoot hBot

2322.6524 5 2224-0.20E-01-0.45E+02 0.47E+02 0.39E-06 -60.0-7460.-8000.  
2327.0916 7 2231-0.21E-01-0.45E+02 0.47E+02 0.39E-06 -60.0-7472.-8000.  
2330.1991 4 2235-0.21E-01-0.45E+02 0.47E+02 0.39E-06 -60.0-7477.-8000.  
2333.3066 4 2239-0.21E-01-0.45E+02 0.47E+02 0.39E-06 -60.0-7501.-8000.  
2336.4141 3 2242-0.22E-01-0.45E+02 0.47E+02 0.39E-06 -60.0-7515.-8000.  
2340.4538 3 2245-0.22E-01-0.45E+02 0.47E+02 0.39E-06 -60.0-7526.-8000.  
2345.7054 4 2249-0.22E-01-0.45E+02 0.47E+02 0.39E-06 -60.0-7512.-8000.  
2350.9571 5 2254-0.21E-01-0.45E+02 0.47E+02 0.39E-06 -60.0-7484.-8000.  
2356.2087 5 2259-0.21E-01-0.45E+02 0.48E+02 0.39E-06 -60.0-7471.-8000.  
2361.4604 3 2262-0.21E-01-0.46E+02 0.48E+02 0.39E-06 -60.0-7462.-8000.  
2368.4092 3 2265-0.20E-01-0.46E+02 0.48E+02 0.39E-06 -60.0-7458.-8000.  
2377.6743 9 2274-0.18E-01-0.46E+02 0.48E+02 0.39E-06 -60.0-7410.-8000.  
2384.2923 4 2278-0.16E-01-0.46E+02 0.48E+02 0.39E-06 -60.0-7371.-8000.  
2390.9102 8 2286-0.18E-01-0.46E+02 0.48E+02 0.39E-06 -60.0-7380.-8000.  
2395.0465 4 2290-0.19E-01-0.46E+02 0.48E+02 0.39E-06 -60.0-7384.-8000.  
2399.1827 6 2296-0.21E-01-0.46E+02 0.48E+02 0.39E-06 -60.0-7431.-8000.  
2403.3189 7 2303-0.21E-01-0.46E+02 0.48E+02 0.39E-06 -60.0-7462.-8000.  
2406.2733 3 2306-0.21E-01-0.46E+02 0.49E+02 0.39E-06 -60.0-7475.-8000.  
2410.7050 4 2310-0.22E-01-0.46E+02 0.49E+02 0.39E-06 -60.0-7519.-8000.  
2415.1367 7 2317-0.21E-01-0.47E+02 0.49E+02 0.39E-06 -60.0-7506.-8000.

Time ItW ItCum vTop SvTop SvRoot SvBot hTop hRoot hBot

2418.0911 3 2320-0.21E-01-0.47E+02 0.49E+02 0.39E-06 -60.0-7501.-8000.  
2421.0456 4 2324-0.22E-01-0.47E+02 0.49E+02 0.39E-06 -60.0-7517.-8000.  
2424.0000 3 2327-0.22E-01-0.47E+02 0.49E+02 0.39E-06 -60.0-7526.-8000.  
2428.6817 2 2329-0.22E-01-0.47E+02 0.49E+02 0.39E-06 -60.0-7535.-8000.  
2434.7679 8 2337-0.21E-01-0.47E+02 0.49E+02 0.39E-06 -60.0-7501.-8000.  
2439.0283 5 2342-0.20E-01-0.47E+02 0.49E+02 0.39E-06 -60.0-7473.-8000.  
2443.2886 7 2349-0.21E-01-0.47E+02 0.49E+02 0.39E-06 -60.0-7481.-8000.  
2446.2709 4 2353-0.21E-01-0.47E+02 0.49E+02 0.39E-06 -60.0-7485.-8000.  
2449.2531 3 2356-0.22E-01-0.47E+02 0.49E+02 0.39E-06 -60.0-7508.-8000.  
2453.1300 4 2360-0.22E-01-0.47E+02 0.50E+02 0.39E-06 -60.0-7524.-8000.  
2457.0069 4 2364-0.22E-01-0.47E+02 0.50E+02 0.39E-06 -60.0-7517.-8000.  
2460.8838 3 2367-0.22E-01-0.48E+02 0.50E+02 0.39E-06 -60.0-7514.-8000.  
2465.9238 2 2369-0.22E-01-0.48E+02 0.50E+02 0.40E-06 -60.0-7511.-8000.  
2472.4758 7 2376-0.21E-01-0.48E+02 0.50E+02 0.39E-06 -60.0-7482.-8000.  
2477.0622 5 2381-0.19E-01-0.48E+02 0.50E+02 0.40E-06 -60.0-7454.-8000.  
2481.6486 7 2388-0.21E-01-0.48E+02 0.50E+02 0.39E-06 -60.0-7466.-8000.  
2484.8591 4 2392-0.21E-01-0.48E+02 0.50E+02 0.39E-06 -60.0-7471.-8000.  
2488.0696 4 2396-0.21E-01-0.48E+02 0.50E+02 0.39E-06 -60.0-7497.-8000.  
2491.2800 3 2399-0.22E-01-0.48E+02 0.50E+02 0.39E-06 -60.0-7512.-8000.  
2495.4536 2 2401-0.22E-01-0.48E+02 0.50E+02 0.40E-06 -60.0-7523.-8000.

| Time      | ItW | ItCum | vTop      | SvTop     | SvRoot   | SvBot    | hTop  | hRoot  | hBot   |
|-----------|-----|-------|-----------|-----------|----------|----------|-------|--------|--------|
| 2500.8793 | 7   | 2408  | -0.21E-01 | -0.48E+02 | 0.50E+02 | 0.40E-06 | -60.0 | -7510. | -8000. |
| 2504.6773 | 4   | 2412  | -0.21E-01 | -0.48E+02 | 0.51E+02 | 0.40E-06 | -60.0 | -7488. | -8000. |
| 2508.4753 | 7   | 2419  | -0.21E-01 | -0.49E+02 | 0.51E+02 | 0.40E-06 | -60.0 | -7498. | -8000. |
| 2511.1339 | 3   | 2422  | -0.22E-01 | -0.49E+02 | 0.51E+02 | 0.40E-06 | -60.0 | -7503. | -8000. |
| 2514.5901 | 3   | 2425  | -0.22E-01 | -0.49E+02 | 0.51E+02 | 0.40E-06 | -60.0 | -7527. | -8000. |
| 2519.0831 | 6   | 2431  | -0.22E-01 | -0.49E+02 | 0.51E+02 | 0.40E-06 | -60.0 | -7525. | -8000. |
| 2523.5761 | 7   | 2438  | -0.21E-01 | -0.49E+02 | 0.51E+02 | 0.40E-06 | -60.0 | -7508. | -8000. |
| 2526.7213 | 4   | 2442  | -0.21E-01 | -0.49E+02 | 0.51E+02 | 0.40E-06 | -60.0 | -7502. | -8000. |
| 2529.8664 | 4   | 2446  | -0.22E-01 | -0.49E+02 | 0.51E+02 | 0.40E-06 | -60.0 | -7515. | -8000. |
| 2533.0115 | 3   | 2449  | -0.22E-01 | -0.49E+02 | 0.51E+02 | 0.40E-06 | -60.0 | -7522. | -8000. |
| 2537.1001 | 2   | 2451  | -0.22E-01 | -0.49E+02 | 0.51E+02 | 0.40E-06 | -60.0 | -7528. | -8000. |
| 2542.4154 | 6   | 2457  | -0.22E-01 | -0.49E+02 | 0.51E+02 | 0.40E-06 | -60.0 | -7513. | -8000. |
| 2547.7306 | 5   | 2462  | -0.21E-01 | -0.49E+02 | 0.51E+02 | 0.40E-06 | -60.0 | -7483. | -8000. |
| 2553.0459 | 7   | 2469  | -0.21E-01 | -0.50E+02 | 0.52E+02 | 0.40E-06 | -60.0 | -7468. | -8000. |
| 2556.7665 | 2   | 2471  | -0.21E-01 | -0.50E+02 | 0.52E+02 | 0.40E-06 | -60.0 | -7462. | -8000. |
| 2561.6034 | 6   | 2477  | -0.21E-01 | -0.50E+02 | 0.52E+02 | 0.40E-06 | -60.0 | -7493. | -8000. |
| 2566.4403 | 7   | 2484  | -0.21E-01 | -0.50E+02 | 0.52E+02 | 0.40E-06 | -60.0 | -7485. | -8000. |
| 2569.8261 | 2   | 2486  | -0.21E-01 | -0.50E+02 | 0.52E+02 | 0.40E-06 | -60.0 | -7480. | -8000. |
| 2574.2277 | 5   | 2491  | -0.21E-01 | -0.50E+02 | 0.52E+02 | 0.40E-06 | -60.0 | -7507. | -8000. |
| 2578.6292 | 7   | 2498  | -0.21E-01 | -0.50E+02 | 0.52E+02 | 0.40E-06 | -60.0 | -7501. | -8000. |

| Time      | ItW | ItCum | vTop      | SvTop     | SvRoot   | SvBot    | hTop  | hRoot  | hBot   |
|-----------|-----|-------|-----------|-----------|----------|----------|-------|--------|--------|
| 2581.7103 | 2   | 2500  | -0.21E-01 | -0.50E+02 | 0.52E+02 | 0.40E-06 | -60.0 | -7497. | -8000. |
| 2585.7157 | 4   | 2504  | -0.22E-01 | -0.50E+02 | 0.52E+02 | 0.40E-06 | -60.0 | -7519. | -8000. |
| 2589.7211 | 5   | 2509  | -0.22E-01 | -0.50E+02 | 0.52E+02 | 0.40E-06 | -60.0 | -7512. | -8000. |
| 2593.7265 | 3   | 2512  | -0.22E-01 | -0.50E+02 | 0.52E+02 | 0.40E-06 | -60.0 | -7510. | -8000. |
| 2598.9336 | 2   | 2514  | -0.22E-01 | -0.50E+02 | 0.53E+02 | 0.40E-06 | -60.0 | -7506. | -8000. |
| 2605.4402 | 7   | 2521  | -0.20E-01 | -0.51E+02 | 0.53E+02 | 0.40E-06 | -60.0 | -7477. | -8000. |
| 2610.1786 | 4   | 2525  | -0.19E-01 | -0.51E+02 | 0.53E+02 | 0.40E-06 | -60.0 | -7451. | -8000. |
| 2614.9170 | 8   | 2533  | -0.21E-01 | -0.51E+02 | 0.53E+02 | 0.40E-06 | -60.0 | -7461. | -8000. |
| 2618.2339 | 4   | 2537  | -0.21E-01 | -0.51E+02 | 0.53E+02 | 0.40E-06 | -60.0 | -7465. | -8000. |
| 2621.5508 | 4   | 2541  | -0.21E-01 | -0.51E+02 | 0.53E+02 | 0.40E-06 | -60.0 | -7492. | -8000. |
| 2624.8677 | 3   | 2544  | -0.22E-01 | -0.51E+02 | 0.53E+02 | 0.40E-06 | -60.0 | -7508. | -8000. |
| 2629.2157 | 2   | 2546  | -0.22E-01 | -0.51E+02 | 0.53E+02 | 0.40E-06 | -60.0 | -7520. | -8000. |
| 2635.0131 | 8   | 2554  | -0.21E-01 | -0.51E+02 | 0.53E+02 | 0.40E-06 | -60.0 | -7505. | -8000. |
| 2639.1541 | 5   | 2559  | -0.20E-01 | -0.51E+02 | 0.53E+02 | 0.40E-06 | -60.0 | -7479. | -8000. |
| 2643.2951 | 7   | 2566  | -0.21E-01 | -0.51E+02 | 0.53E+02 | 0.40E-06 | -60.0 | -7487. | -8000. |
| 2645.8832 | 3   | 2569  | -0.21E-01 | -0.51E+02 | 0.54E+02 | 0.40E-06 | -60.0 | -7491. | -8000. |
| 2649.5065 | 4   | 2573  | -0.22E-01 | -0.52E+02 | 0.54E+02 | 0.40E-06 | -60.0 | -7524. | -8000. |
| 2653.1299 | 5   | 2578  | -0.22E-01 | -0.52E+02 | 0.54E+02 | 0.40E-06 | -60.0 | -7521. | -8000. |
| 2656.7533 | 3   | 2581  | -0.22E-01 | -0.52E+02 | 0.54E+02 | 0.40E-06 | -60.0 | -7520. | -8000. |
| 2660.3766 | 2   | 2583  | -0.22E-01 | -0.52E+02 | 0.54E+02 | 0.40E-06 | -60.0 | -7519. | -8000. |

| Time | ItW | ItCum | vTop | SvTop | SvRoot | SvBot | hTop | hRoot | hBot |
|------|-----|-------|------|-------|--------|-------|------|-------|------|
|------|-----|-------|------|-------|--------|-------|------|-------|------|

|           |   |                        |          |          |                   |
|-----------|---|------------------------|----------|----------|-------------------|
| 2664.0000 | 2 | 2585-0.22E-01-0.52E+02 | 0.54E+02 | 0.40E-06 | -60.0-7518.-8000. |
| 2670.0345 | 2 | 2587-0.22E-01-0.52E+02 | 0.54E+02 | 0.40E-06 | -60.0-7517.-8000. |
| 2677.8794 | 8 | 2595-0.19E-01-0.52E+02 | 0.54E+02 | 0.40E-06 | -60.0-7456.-8000. |
| 2683.3708 | 7 | 2602-0.18E-01-0.52E+02 | 0.54E+02 | 0.40E-06 | -60.0-7418.-8000. |
| 2687.2148 | 7 | 2609-0.19E-01-0.52E+02 | 0.54E+02 | 0.40E-06 | -60.0-7424.-8000. |
| 2689.9056 | 4 | 2613-0.20E-01-0.52E+02 | 0.54E+02 | 0.40E-06 | -60.0-7445.-8000. |
| 2692.5964 | 4 | 2617-0.21E-01-0.52E+02 | 0.54E+02 | 0.40E-06 | -60.0-7479.-8000. |
| 2695.2872 | 2 | 2619-0.21E-01-0.52E+02 | 0.55E+02 | 0.40E-06 | -60.0-7503.-8000. |
| 2698.7852 | 4 | 2623-0.21E-01-0.53E+02 | 0.55E+02 | 0.40E-06 | -60.0-7521.-8000. |
| 2702.2832 | 3 | 2626-0.21E-01-0.53E+02 | 0.55E+02 | 0.40E-06 | -60.0-7518.-8000. |
| 2706.8307 | 3 | 2629-0.21E-01-0.53E+02 | 0.55E+02 | 0.40E-06 | -60.0-7517.-8000. |
| 2712.7424 | 7 | 2636-0.21E-01-0.53E+02 | 0.55E+02 | 0.41E-06 | -60.0-7495.-8000. |
| 2716.8805 | 6 | 2642-0.20E-01-0.53E+02 | 0.55E+02 | 0.41E-06 | -60.0-7472.-8000. |
| 2721.0187 | 7 | 2649-0.20E-01-0.53E+02 | 0.55E+02 | 0.40E-06 | -60.0-7481.-8000. |
| 2723.9154 | 4 | 2653-0.21E-01-0.53E+02 | 0.55E+02 | 0.40E-06 | -60.0-7485.-8000. |
| 2726.8121 | 3 | 2656-0.21E-01-0.53E+02 | 0.55E+02 | 0.40E-06 | -60.0-7505.-8000. |
| 2730.5779 | 3 | 2659-0.21E-01-0.53E+02 | 0.55E+02 | 0.41E-06 | -60.0-7519.-8000. |
| 2735.4733 | 3 | 2662-0.21E-01-0.53E+02 | 0.55E+02 | 0.41E-06 | -60.0-7512.-8000. |
| 2741.8374 | 4 | 2666-0.21E-01-0.53E+02 | 0.55E+02 | 0.41E-06 | -60.0-7483.-8000. |
| 2748.2015 | 6 | 2672-0.19E-01-0.54E+02 | 0.56E+02 | 0.41E-06 | -60.0-7445.-8000. |

Time ItW ItCum vTop SvTop SvRoot SvBot hTop hRoot hBot

|           |   |                        |          |          |                   |
|-----------|---|------------------------|----------|----------|-------------------|
| 2754.5656 | 7 | 2679-0.19E-01-0.54E+02 | 0.56E+02 | 0.41E-06 | -60.0-7427.-8000. |
| 2759.0205 | 3 | 2682-0.19E-01-0.54E+02 | 0.56E+02 | 0.41E-06 | -60.0-7420.-8000. |
| 2764.8118 | 6 | 2688-0.20E-01-0.54E+02 | 0.56E+02 | 0.41E-06 | -60.0-7457.-8000. |
| 2770.6031 | 8 | 2696-0.20E-01-0.54E+02 | 0.56E+02 | 0.41E-06 | -60.0-7447.-8000. |
| 2774.6570 | 3 | 2699-0.20E-01-0.54E+02 | 0.56E+02 | 0.41E-06 | -60.0-7441.-8000. |
| 2779.9271 | 6 | 2705-0.20E-01-0.54E+02 | 0.56E+02 | 0.41E-06 | -60.0-7474.-8000. |
| 2785.1972 | 7 | 2712-0.20E-01-0.54E+02 | 0.56E+02 | 0.41E-06 | -60.0-7465.-8000. |
| 2788.8863 | 3 | 2715-0.20E-01-0.54E+02 | 0.56E+02 | 0.41E-06 | -60.0-7461.-8000. |
| 2793.6821 | 6 | 2721-0.21E-01-0.54E+02 | 0.57E+02 | 0.41E-06 | -60.0-7489.-8000. |
| 2798.4779 | 6 | 2727-0.20E-01-0.55E+02 | 0.57E+02 | 0.41E-06 | -60.0-7481.-8000. |
| 2803.2737 | 3 | 2730-0.21E-01-0.55E+02 | 0.57E+02 | 0.41E-06 | -60.0-7477.-8000. |
| 2809.5082 | 2 | 2732-0.21E-01-0.55E+02 | 0.57E+02 | 0.41E-06 | -60.0-7472.-8000. |
| 2817.3407 | 8 | 2740-0.19E-01-0.55E+02 | 0.57E+02 | 0.41E-06 | -60.0-7437.-8000. |
| 2823.0141 | 2 | 2742-0.18E-01-0.55E+02 | 0.57E+02 | 0.41E-06 | -60.0-7406.-8000. |
| 2830.1373 | 9 | 2751-0.19E-01-0.55E+02 | 0.57E+02 | 0.41E-06 | -60.0-7422.-8000. |
| 2835.1236 | 8 | 2759-0.18E-01-0.55E+02 | 0.57E+02 | 0.41E-06 | -60.0-7409.-8000. |
| 2838.7376 | 5 | 2764-0.20E-01-0.55E+02 | 0.57E+02 | 0.41E-06 | -60.0-7425.-8000. |
| 2842.3515 | 5 | 2769-0.20E-01-0.55E+02 | 0.57E+02 | 0.41E-06 | -60.0-7460.-8000. |
| 2846.1164 | 4 | 2773-0.21E-01-0.55E+02 | 0.58E+02 | 0.41E-06 | -60.0-7483.-8000. |
| 2849.8812 | 3 | 2776-0.21E-01-0.56E+02 | 0.58E+02 | 0.41E-06 | -60.0-7495.-8000. |

Time ItW ItCum vTop SvTop SvRoot SvBot hTop hRoot hBot

|           |   |                        |          |          |                   |
|-----------|---|------------------------|----------|----------|-------------------|
| 2854.9010 | 2 | 2778-0.21E-01-0.56E+02 | 0.58E+02 | 0.41E-06 | -60.0-7503.-8000. |
|-----------|---|------------------------|----------|----------|-------------------|



|           |   |                        |          |          |                   |
|-----------|---|------------------------|----------|----------|-------------------|
| 2861.1758 | 7 | 2785-0.20E-01-0.56E+02 | 0.58E+02 | 0.41E-06 | -60.0-7479.-8000. |
| 2865.8818 | 5 | 2790-0.19E-01-0.56E+02 | 0.58E+02 | 0.41E-06 | -60.0-7454.-8000. |
| 2870.5879 | 7 | 2797-0.20E-01-0.56E+02 | 0.58E+02 | 0.41E-06 | -60.0-7462.-8000. |
| 2873.7253 | 3 | 2800-0.20E-01-0.56E+02 | 0.58E+02 | 0.41E-06 | -60.0-7466.-8000. |
| 2876.8626 | 4 | 2804-0.21E-01-0.56E+02 | 0.58E+02 | 0.41E-06 | -60.0-7491.-8000. |
| 2880.0000 | 3 | 2807-0.21E-01-0.56E+02 | 0.58E+02 | 0.41E-06 | -60.0-7506.-8000. |
| 2885.3333 | 3 | 2810-0.21E-01-0.56E+02 | 0.58E+02 | 0.41E-06 | -60.0-7521.-8000. |
| 2892.4444 | 8 | 2818-0.20E-01-0.56E+02 | 0.58E+02 | 0.41E-06 | -60.0-7476.-8000. |
| 2896.8889 | 6 | 2824-0.19E-01-0.57E+02 | 0.59E+02 | 0.41E-06 | -60.0-7446.-8000. |
| 2901.3333 | 8 | 2832-0.20E-01-0.57E+02 | 0.59E+02 | 0.41E-06 | -60.0-7460.-8000. |
| 2904.6667 | 4 | 2836-0.20E-01-0.57E+02 | 0.59E+02 | 0.41E-06 | -60.0-7467.-8000. |
| 2908.0000 | 5 | 2841-0.21E-01-0.57E+02 | 0.59E+02 | 0.41E-06 | -60.0-7490.-8000. |
| 2911.3333 | 3 | 2844-0.21E-01-0.57E+02 | 0.59E+02 | 0.41E-06 | -60.0-7504.-8000. |
| 2915.5000 | 2 | 2846-0.21E-01-0.57E+02 | 0.59E+02 | 0.41E-06 | -60.0-7513.-8000. |
| 2921.7500 | 8 | 2854-0.21E-01-0.57E+02 | 0.59E+02 | 0.41E-06 | -60.0-7502.-8000. |
| 2924.8750 | 6 | 2860-0.20E-01-0.57E+02 | 0.59E+02 | 0.41E-06 | -60.0-7481.-8000. |
| 2928.0000 | 7 | 2867-0.21E-01-0.57E+02 | 0.59E+02 | 0.41E-06 | -60.0-7496.-8000. |
| 2930.6679 | 4 | 2871-0.21E-01-0.57E+02 | 0.59E+02 | 0.41E-06 | -60.0-7507.-8000. |
| 2933.3359 | 3 | 2874-0.22E-01-0.57E+02 | 0.59E+02 | 0.41E-06 | -60.0-7523.-8000. |

| Time | ItW | ItCum | vTop | SvTop | SvRoot | SvBot | hTop | hRoot | hBot |
|------|-----|-------|------|-------|--------|-------|------|-------|------|
|------|-----|-------|------|-------|--------|-------|------|-------|------|

|           |   |                        |          |          |                   |
|-----------|---|------------------------|----------|----------|-------------------|
| 2936.8042 | 4 | 2878-0.22E-01-0.57E+02 | 0.59E+02 | 0.41E-06 | -60.0-7537.-8000. |
| 2940.2725 | 4 | 2882-0.22E-01-0.57E+02 | 0.59E+02 | 0.41E-06 | -60.0-7531.-8000. |
| 2943.7408 | 3 | 2885-0.22E-01-0.57E+02 | 0.60E+02 | 0.41E-06 | -60.0-7529.-8000. |
| 2948.2497 | 3 | 2888-0.22E-01-0.58E+02 | 0.60E+02 | 0.41E-06 | -60.0-7526.-8000. |
| 2954.1111 | 7 | 2895-0.21E-01-0.58E+02 | 0.60E+02 | 0.41E-06 | -60.0-7502.-8000. |
| 2958.2142 | 5 | 2900-0.20E-01-0.58E+02 | 0.60E+02 | 0.41E-06 | -60.0-7477.-8000. |
| 2962.3172 | 7 | 2907-0.21E-01-0.58E+02 | 0.60E+02 | 0.41E-06 | -60.0-7488.-8000. |
| 2965.1893 | 4 | 2911-0.22E-01-0.58E+02 | 0.60E+02 | 0.42E-06 | -60.0-7492.-8000. |
| 2968.0614 | 3 | 2914-0.22E-01-0.58E+02 | 0.60E+02 | 0.41E-06 | -60.0-7514.-8000. |
| 2971.7952 | 4 | 2918-0.22E-01-0.58E+02 | 0.60E+02 | 0.41E-06 | -60.0-7530.-8000. |
| 2975.5289 | 4 | 2922-0.22E-01-0.58E+02 | 0.60E+02 | 0.41E-06 | -60.0-7523.-8000. |
| 2979.2627 | 3 | 2925-0.22E-01-0.58E+02 | 0.60E+02 | 0.42E-06 | -60.0-7520.-8000. |
| 2984.1166 | 2 | 2927-0.22E-01-0.58E+02 | 0.60E+02 | 0.41E-06 | -60.0-7517.-8000. |
| 2990.4266 | 7 | 2934-0.21E-01-0.59E+02 | 0.60E+02 | 0.42E-06 | -60.0-7490.-8000. |
| 2994.8436 | 5 | 2939-0.20E-01-0.59E+02 | 0.61E+02 | 0.42E-06 | -60.0-7462.-8000. |
| 2999.2607 | 7 | 2946-0.21E-01-0.59E+02 | 0.61E+02 | 0.42E-06 | -60.0-7474.-8000. |
| 3002.3526 | 4 | 2950-0.21E-01-0.59E+02 | 0.61E+02 | 0.42E-06 | -60.0-7479.-8000. |
| 3005.4445 | 4 | 2954-0.22E-01-0.59E+02 | 0.61E+02 | 0.42E-06 | -60.0-7504.-8000. |
| 3008.5364 | 3 | 2957-0.22E-01-0.59E+02 | 0.61E+02 | 0.42E-06 | -60.0-7518.-8000. |
| 3012.5559 | 3 | 2960-0.22E-01-0.59E+02 | 0.61E+02 | 0.42E-06 | -60.0-7529.-8000. |

| Time | ItW | ItCum | vTop | SvTop | SvRoot | SvBot | hTop | hRoot | hBot |
|------|-----|-------|------|-------|--------|-------|------|-------|------|
|------|-----|-------|------|-------|--------|-------|------|-------|------|

|           |   |                        |          |          |                   |
|-----------|---|------------------------|----------|----------|-------------------|
| 3017.7813 | 5 | 2965-0.22E-01-0.59E+02 | 0.61E+02 | 0.42E-06 | -60.0-7514.-8000. |
| 3023.0066 | 6 | 2971-0.21E-01-0.59E+02 | 0.61E+02 | 0.42E-06 | -60.0-7486.-8000. |
| 3028.2320 | 5 | 2976-0.21E-01-0.59E+02 | 0.61E+02 | 0.42E-06 | -60.0-7473.-8000. |

|           |   |                        |          |          |                   |
|-----------|---|------------------------|----------|----------|-------------------|
| 3033.4573 | 4 | 2980-0.21E-01-0.59E+02 | 0.61E+02 | 0.42E-06 | -60.0-7465.-8000. |
| 3038.6826 | 2 | 2982-0.21E-01-0.60E+02 | 0.62E+02 | 0.42E-06 | -60.0-7461.-8000. |
| 3045.4756 | 2 | 2984-0.20E-01-0.60E+02 | 0.62E+02 | 0.42E-06 | -60.0-7457.-8000. |
| 3054.3064 | 8 | 2992-0.18E-01-0.60E+02 | 0.62E+02 | 0.42E-06 | -60.0-7414.-8000. |
| 3060.4880 | 3 | 2995-0.17E-01-0.60E+02 | 0.62E+02 | 0.42E-06 | -60.0-7380.-8000. |
| 3068.5241 | 9 | 3004-0.19E-01-0.60E+02 | 0.62E+02 | 0.42E-06 | -60.0-7398.-8000. |
| 3074.1493 | 7 | 3011-0.18E-01-0.60E+02 | 0.62E+02 | 0.43E-06 | -60.0-7381.-8000. |
| 3078.0870 | 5 | 3016-0.19E-01-0.60E+02 | 0.62E+02 | 0.42E-06 | -60.0-7397.-8000. |
| 3082.0246 | 4 | 3020-0.21E-01-0.60E+02 | 0.62E+02 | 0.42E-06 | -60.0-7443.-8000. |
| 3085.9623 | 5 | 3025-0.22E-01-0.60E+02 | 0.62E+02 | 0.42E-06 | -60.0-7472.-8000. |
| 3089.9000 | 3 | 3028-0.22E-01-0.61E+02 | 0.62E+02 | 0.42E-06 | -60.0-7491.-8000. |
| 3095.0189 | 3 | 3031-0.22E-01-0.61E+02 | 0.63E+02 | 0.42E-06 | -60.0-7502.-8000. |
| 3101.6736 | 7 | 3038-0.21E-01-0.61E+02 | 0.63E+02 | 0.42E-06 | -60.0-7477.-8000. |
| 3106.3319 | 5 | 3043-0.19E-01-0.61E+02 | 0.63E+02 | 0.42E-06 | -60.0-7450.-8000. |
| 3110.9901 | 8 | 3051-0.21E-01-0.61E+02 | 0.63E+02 | 0.42E-06 | -60.0-7462.-8000. |
| 3114.2509 | 4 | 3055-0.21E-01-0.61E+02 | 0.63E+02 | 0.42E-06 | -60.0-7467.-8000. |
| 3117.5117 | 4 | 3059-0.21E-01-0.61E+02 | 0.63E+02 | 0.42E-06 | -60.0-7495.-8000. |

Time ItW ItCum vTop SvTop SvRoot SvBot hTop hRoot hBot

|           |   |                        |          |          |                   |
|-----------|---|------------------------|----------|----------|-------------------|
| 3120.7725 | 3 | 3062-0.22E-01-0.61E+02 | 0.63E+02 | 0.42E-06 | -60.0-7511.-8000. |
| 3125.0115 | 2 | 3064-0.22E-01-0.61E+02 | 0.63E+02 | 0.42E-06 | -60.0-7524.-8000. |
| 3130.3850 | 7 | 3071-0.22E-01-0.61E+02 | 0.63E+02 | 0.42E-06 | -60.0-7510.-8000. |
| 3134.1465 | 4 | 3075-0.21E-01-0.61E+02 | 0.63E+02 | 0.42E-06 | -60.0-7489.-8000. |
| 3137.9080 | 6 | 3081-0.21E-01-0.62E+02 | 0.63E+02 | 0.42E-06 | -60.0-7501.-8000. |
| 3141.6695 | 4 | 3085-0.22E-01-0.62E+02 | 0.64E+02 | 0.42E-06 | -60.0-7507.-8000. |
| 3145.4310 | 2 | 3087-0.22E-01-0.62E+02 | 0.64E+02 | 0.43E-06 | -60.0-7512.-8000. |
| 3149.9448 | 3 | 3090-0.22E-01-0.62E+02 | 0.64E+02 | 0.43E-06 | -60.0-7513.-8000. |
| 3155.9632 | 7 | 3097-0.21E-01-0.62E+02 | 0.64E+02 | 0.42E-06 | -60.0-7497.-8000. |
| 3159.9755 | 7 | 3104-0.20E-01-0.62E+02 | 0.64E+02 | 0.42E-06 | -60.0-7474.-8000. |
| 3162.6503 | 5 | 3109-0.21E-01-0.62E+02 | 0.64E+02 | 0.42E-06 | -60.0-7482.-8000. |
| 3165.3252 | 3 | 3112-0.22E-01-0.62E+02 | 0.64E+02 | 0.42E-06 | -60.0-7508.-8000. |
| 3168.0000 | 3 | 3115-0.22E-01-0.62E+02 | 0.64E+02 | 0.42E-06 | -60.0-7524.-8000. |
| 3172.1527 | 4 | 3119-0.23E-01-0.62E+02 | 0.64E+02 | 0.42E-06 | -60.0-7541.-8000. |
| 3176.3054 | 6 | 3125-0.23E-01-0.62E+02 | 0.64E+02 | 0.42E-06 | -60.0-7525.-8000. |
| 3180.4582 | 5 | 3130-0.23E-01-0.62E+02 | 0.64E+02 | 0.43E-06 | -60.0-7517.-8000. |
| 3184.6109 | 3 | 3133-0.23E-01-0.63E+02 | 0.65E+02 | 0.43E-06 | -60.0-7513.-8000. |
| 3190.0094 | 3 | 3136-0.23E-01-0.63E+02 | 0.65E+02 | 0.43E-06 | -60.0-7509.-8000. |
| 3197.0275 | 8 | 3144-0.20E-01-0.63E+02 | 0.65E+02 | 0.43E-06 | -60.0-7472.-8000. |
| 3201.9402 | 2 | 3146-0.19E-01-0.63E+02 | 0.65E+02 | 0.43E-06 | -60.0-7441.-8000. |

Time ItW ItCum vTop SvTop SvRoot SvBot hTop hRoot hBot

|           |   |                        |          |          |                   |
|-----------|---|------------------------|----------|----------|-------------------|
| 3208.3266 | 9 | 3155-0.21E-01-0.63E+02 | 0.65E+02 | 0.42E-06 | -60.0-7458.-8000. |
| 3212.7972 | 7 | 3162-0.20E-01-0.63E+02 | 0.65E+02 | 0.42E-06 | -60.0-7442.-8000. |
| 3215.9265 | 6 | 3168-0.22E-01-0.63E+02 | 0.65E+02 | 0.42E-06 | -60.0-7456.-8000. |
| 3219.0559 | 4 | 3172-0.23E-01-0.63E+02 | 0.65E+02 | 0.42E-06 | -60.0-7495.-8000. |
| 3222.1853 | 7 | 3179-0.23E-01-0.63E+02 | 0.65E+02 | 0.43E-06 | -60.0-7522.-8000. |

|           |   |                        |          |          |                   |
|-----------|---|------------------------|----------|----------|-------------------|
| 3224.3758 | 3 | 3182-0.24E-01-0.63E+02 | 0.65E+02 | 0.43E-06 | -60.0-7531.-8000. |
| 3227.2235 | 3 | 3185-0.24E-01-0.63E+02 | 0.65E+02 | 0.43E-06 | -60.0-7561.-8000. |
| 3230.9256 | 6 | 3191-0.24E-01-0.64E+02 | 0.66E+02 | 0.43E-06 | -60.0-7562.-8000. |
| 3234.6276 | 7 | 3198-0.24E-01-0.64E+02 | 0.66E+02 | 0.43E-06 | -60.0-7547.-8000. |
| 3237.2191 | 3 | 3201-0.24E-01-0.64E+02 | 0.66E+02 | 0.43E-06 | -60.0-7541.-8000. |
| 3240.5879 | 4 | 3205-0.24E-01-0.64E+02 | 0.66E+02 | 0.43E-06 | -60.0-7559.-8000. |
| 3243.9568 | 6 | 3211-0.24E-01-0.64E+02 | 0.66E+02 | 0.43E-06 | -60.0-7552.-8000. |
| 3247.3256 | 3 | 3214-0.24E-01-0.64E+02 | 0.66E+02 | 0.43E-06 | -60.0-7548.-8000. |
| 3251.7051 | 3 | 3217-0.24E-01-0.64E+02 | 0.66E+02 | 0.43E-06 | -60.0-7545.-8000. |
| 3257.3985 | 7 | 3224-0.22E-01-0.64E+02 | 0.66E+02 | 0.43E-06 | -60.0-7515.-8000. |
| 3261.3839 | 5 | 3229-0.21E-01-0.64E+02 | 0.66E+02 | 0.43E-06 | -60.0-7488.-8000. |
| 3265.3692 | 7 | 3236-0.23E-01-0.64E+02 | 0.66E+02 | 0.43E-06 | -60.0-7500.-8000. |
| 3268.1590 | 4 | 3240-0.23E-01-0.64E+02 | 0.66E+02 | 0.43E-06 | -60.0-7505.-8000. |
| 3270.9487 | 4 | 3244-0.23E-01-0.64E+02 | 0.66E+02 | 0.43E-06 | -60.0-7530.-8000. |
| 3273.7385 | 5 | 3249-0.24E-01-0.65E+02 | 0.67E+02 | 0.43E-06 | -60.0-7546.-8000. |

| Time | ItW | ItCum | vTop | SvTop | SvRoot | SvBot | hTop | hRoot | hBot |
|------|-----|-------|------|-------|--------|-------|------|-------|------|
|------|-----|-------|------|-------|--------|-------|------|-------|------|

|           |   |                        |          |          |                   |
|-----------|---|------------------------|----------|----------|-------------------|
| 3276.5282 | 4 | 3253-0.24E-01-0.65E+02 | 0.67E+02 | 0.43E-06 | -60.0-7554.-8000. |
| 3279.3180 | 3 | 3256-0.24E-01-0.65E+02 | 0.67E+02 | 0.43E-06 | -60.0-7559.-8000. |
| 3282.9447 | 3 | 3259-0.24E-01-0.65E+02 | 0.67E+02 | 0.43E-06 | -60.0-7562.-8000. |
| 3287.6593 | 7 | 3266-0.24E-01-0.65E+02 | 0.67E+02 | 0.43E-06 | -60.0-7545.-8000. |
| 3290.9596 | 5 | 3271-0.23E-01-0.65E+02 | 0.67E+02 | 0.43E-06 | -60.0-7523.-8000. |
| 3294.2599 | 7 | 3278-0.23E-01-0.65E+02 | 0.67E+02 | 0.43E-06 | -60.0-7531.-8000. |
| 3296.5701 | 4 | 3282-0.24E-01-0.65E+02 | 0.67E+02 | 0.43E-06 | -60.0-7536.-8000. |
| 3298.8803 | 3 | 3285-0.24E-01-0.65E+02 | 0.67E+02 | 0.43E-06 | -60.0-7554.-8000. |
| 3301.8835 | 4 | 3289-0.24E-01-0.65E+02 | 0.67E+02 | 0.43E-06 | -60.0-7567.-8000. |
| 3304.8868 | 4 | 3293-0.24E-01-0.65E+02 | 0.67E+02 | 0.43E-06 | -60.0-7562.-8000. |
| 3307.8900 | 3 | 3296-0.24E-01-0.65E+02 | 0.67E+02 | 0.43E-06 | -60.0-7560.-8000. |
| 3311.7942 | 3 | 3299-0.24E-01-0.65E+02 | 0.67E+02 | 0.43E-06 | -60.0-7557.-8000. |
| 3316.8697 | 8 | 3307-0.23E-01-0.66E+02 | 0.67E+02 | 0.43E-06 | -60.0-7535.-8000. |
| 3320.4226 | 5 | 3312-0.22E-01-0.66E+02 | 0.68E+02 | 0.43E-06 | -60.0-7511.-8000. |
| 3323.9754 | 7 | 3319-0.23E-01-0.66E+02 | 0.68E+02 | 0.43E-06 | -60.0-7521.-8000. |
| 3326.4624 | 6 | 3325-0.23E-01-0.66E+02 | 0.68E+02 | 0.43E-06 | -60.0-7525.-8000. |
| 3328.9494 | 3 | 3328-0.24E-01-0.66E+02 | 0.68E+02 | 0.43E-06 | -60.0-7546.-8000. |
| 3332.1825 | 4 | 3332-0.24E-01-0.66E+02 | 0.68E+02 | 0.43E-06 | -60.0-7561.-8000. |
| 3335.4156 | 5 | 3337-0.24E-01-0.66E+02 | 0.68E+02 | 0.43E-06 | -60.0-7555.-8000. |
| 3338.6487 | 3 | 3340-0.24E-01-0.66E+02 | 0.68E+02 | 0.43E-06 | -60.0-7552.-8000. |

| Time | ItW | ItCum | vTop | SvTop | SvRoot | SvBot | hTop | hRoot | hBot |
|------|-----|-------|------|-------|--------|-------|------|-------|------|
|------|-----|-------|------|-------|--------|-------|------|-------|------|

|           |   |                        |          |          |                   |
|-----------|---|------------------------|----------|----------|-------------------|
| 3342.8517 | 3 | 3343-0.24E-01-0.66E+02 | 0.68E+02 | 0.43E-06 | -60.0-7549.-8000. |
| 3348.3156 | 7 | 3350-0.23E-01-0.66E+02 | 0.68E+02 | 0.43E-06 | -60.0-7522.-8000. |
| 3352.1403 | 5 | 3355-0.21E-01-0.66E+02 | 0.68E+02 | 0.43E-06 | -60.0-7496.-8000. |
| 3355.9651 | 7 | 3362-0.23E-01-0.66E+02 | 0.68E+02 | 0.43E-06 | -60.0-7507.-8000. |
| 3358.6424 | 4 | 3366-0.23E-01-0.67E+02 | 0.68E+02 | 0.43E-06 | -60.0-7512.-8000. |
| 3361.3197 | 4 | 3370-0.24E-01-0.67E+02 | 0.69E+02 | 0.43E-06 | -60.0-7535.-8000. |
| 3363.9970 | 3 | 3373-0.24E-01-0.67E+02 | 0.69E+02 | 0.43E-06 | -60.0-7549.-8000. |

|           |   |                        |          |          |                   |
|-----------|---|------------------------|----------|----------|-------------------|
| 3367.4776 | 3 | 3376-0.24E-01-0.67E+02 | 0.69E+02 | 0.43E-06 | -60.0-7561.-8000. |
| 3371.9801 | 7 | 3383-0.24E-01-0.67E+02 | 0.69E+02 | 0.43E-06 | -60.0-7549.-8000. |
| 3375.1473 | 6 | 3389-0.23E-01-0.67E+02 | 0.69E+02 | 0.43E-06 | -60.0-7529.-8000. |
| 3378.4326 | 6 | 3395-0.24E-01-0.67E+02 | 0.69E+02 | 0.43E-06 | -60.0-7539.-8000. |
| 3381.7179 | 3 | 3398-0.24E-01-0.67E+02 | 0.69E+02 | 0.43E-06 | -60.0-7542.-8000. |
| 3386.0982 | 3 | 3401-0.24E-01-0.67E+02 | 0.69E+02 | 0.43E-06 | -60.0-7545.-8000. |
| 3391.5737 | 7 | 3408-0.23E-01-0.67E+02 | 0.69E+02 | 0.43E-06 | -60.0-7516.-8000. |
| 3395.6802 | 5 | 3413-0.21E-01-0.67E+02 | 0.69E+02 | 0.43E-06 | -60.0-7491.-8000. |
| 3399.7868 | 7 | 3420-0.23E-01-0.67E+02 | 0.69E+02 | 0.43E-06 | -60.0-7499.-8000. |
| 3402.5246 | 3 | 3423-0.23E-01-0.68E+02 | 0.69E+02 | 0.43E-06 | -60.0-7503.-8000. |
| 3405.2623 | 4 | 3427-0.23E-01-0.68E+02 | 0.70E+02 | 0.43E-06 | -60.0-7529.-8000. |
| 3408.0000 | 5 | 3432-0.24E-01-0.68E+02 | 0.70E+02 | 0.43E-06 | -60.0-7546.-8000. |
| 3411.4097 | 4 | 3436-0.24E-01-0.68E+02 | 0.70E+02 | 0.43E-06 | -60.0-7558.-8000. |

Time ItW ItCum vTop SvTop SvRoot SvBot hTop hRoot hBot

|           |   |                        |          |          |                   |
|-----------|---|------------------------|----------|----------|-------------------|
| 3414.8193 | 7 | 3443-0.22E-01-0.68E+02 | 0.70E+02 | 0.43E-06 | -60.0-7546.-8000. |
| 3417.2061 | 3 | 3446-0.22E-01-0.68E+02 | 0.70E+02 | 0.43E-06 | -60.0-7540.-8000. |
| 3420.3089 | 4 | 3450-0.22E-01-0.68E+02 | 0.70E+02 | 0.43E-06 | -60.0-7549.-8000. |
| 3423.4117 | 3 | 3453-0.22E-01-0.68E+02 | 0.70E+02 | 0.43E-06 | -60.0-7541.-8000. |
| 3427.4453 | 4 | 3457-0.22E-01-0.68E+02 | 0.70E+02 | 0.44E-06 | -60.0-7538.-8000. |
| 3431.4789 | 4 | 3461-0.22E-01-0.68E+02 | 0.70E+02 | 0.44E-06 | -60.0-7521.-8000. |
| 3435.5125 | 4 | 3465-0.22E-01-0.68E+02 | 0.70E+02 | 0.44E-06 | -60.0-7514.-8000. |
| 3439.5462 | 2 | 3467-0.22E-01-0.68E+02 | 0.70E+02 | 0.44E-06 | -60.0-7510.-8000. |
| 3444.7899 | 2 | 3469-0.22E-01-0.68E+02 | 0.70E+02 | 0.44E-06 | -60.0-7506.-8000. |
| 3451.6067 | 7 | 3476-0.20E-01-0.69E+02 | 0.70E+02 | 0.44E-06 | -60.0-7474.-8000. |
| 3456.3785 | 4 | 3480-0.19E-01-0.69E+02 | 0.71E+02 | 0.44E-06 | -60.0-7446.-8000. |
| 3461.1503 | 8 | 3488-0.21E-01-0.69E+02 | 0.71E+02 | 0.44E-06 | -60.0-7457.-8000. |
| 3464.4905 | 4 | 3492-0.21E-01-0.69E+02 | 0.71E+02 | 0.44E-06 | -60.0-7463.-8000. |
| 3467.8308 | 4 | 3496-0.21E-01-0.69E+02 | 0.71E+02 | 0.44E-06 | -60.0-7491.-8000. |
| 3471.1710 | 3 | 3499-0.22E-01-0.69E+02 | 0.71E+02 | 0.44E-06 | -60.0-7507.-8000. |
| 3475.5133 | 2 | 3501-0.22E-01-0.69E+02 | 0.71E+02 | 0.44E-06 | -60.0-7520.-8000. |
| 3481.1584 | 8 | 3509-0.21E-01-0.69E+02 | 0.71E+02 | 0.44E-06 | -60.0-7506.-8000. |
| 3485.1099 | 4 | 3513-0.21E-01-0.69E+02 | 0.71E+02 | 0.44E-06 | -60.0-7483.-8000. |
| 3489.0614 | 7 | 3520-0.21E-01-0.69E+02 | 0.71E+02 | 0.44E-06 | -60.0-7493.-8000. |
| 3491.8274 | 3 | 3523-0.22E-01-0.69E+02 | 0.71E+02 | 0.44E-06 | -60.0-7498.-8000. |

Time ItW ItCum vTop SvTop SvRoot SvBot hTop hRoot hBot

|           |   |                        |          |          |                   |
|-----------|---|------------------------|----------|----------|-------------------|
| 3495.4233 | 4 | 3527-0.22E-01-0.70E+02 | 0.71E+02 | 0.44E-06 | -60.0-7524.-8000. |
| 3499.0192 | 5 | 3532-0.22E-01-0.70E+02 | 0.72E+02 | 0.44E-06 | -60.0-7522.-8000. |
| 3502.6151 | 3 | 3535-0.22E-01-0.70E+02 | 0.72E+02 | 0.44E-06 | -60.0-7522.-8000. |
| 3507.2897 | 2 | 3537-0.22E-01-0.70E+02 | 0.72E+02 | 0.44E-06 | -60.0-7520.-8000. |
| 3513.3667 | 7 | 3544-0.21E-01-0.70E+02 | 0.72E+02 | 0.44E-06 | -60.0-7495.-8000. |
| 3517.6207 | 5 | 3549-0.20E-01-0.70E+02 | 0.72E+02 | 0.44E-06 | -60.0-7469.-8000. |
| 3521.8746 | 7 | 3556-0.21E-01-0.70E+02 | 0.72E+02 | 0.44E-06 | -60.0-7480.-8000. |
| 3524.8523 | 4 | 3560-0.21E-01-0.70E+02 | 0.72E+02 | 0.44E-06 | -60.0-7485.-8000. |
| 3527.8301 | 3 | 3563-0.22E-01-0.70E+02 | 0.72E+02 | 0.44E-06 | -60.0-7508.-8000. |

|           |   |                        |          |          |                   |
|-----------|---|------------------------|----------|----------|-------------------|
| 3531.7011 | 5 | 3568-0.22E-01-0.70E+02 | 0.72E+02 | 0.44E-06 | -60.0-7525.-8000. |
| 3535.5722 | 5 | 3573-0.22E-01-0.70E+02 | 0.72E+02 | 0.44E-06 | -60.0-7518.-8000. |
| 3539.4433 | 3 | 3576-0.22E-01-0.70E+02 | 0.72E+02 | 0.44E-06 | -60.0-7515.-8000. |
| 3544.4756 | 2 | 3578-0.22E-01-0.71E+02 | 0.72E+02 | 0.44E-06 | -60.0-7511.-8000. |
| 3551.4162 | 7 | 3585-0.21E-01-0.71E+02 | 0.73E+02 | 0.44E-06 | -60.0-7480.-8000. |
| 3555.9957 | 5 | 3590-0.19E-01-0.71E+02 | 0.73E+02 | 0.44E-06 | -60.0-7449.-8000. |
| 3560.3961 | 8 | 3598-0.21E-01-0.71E+02 | 0.73E+02 | 0.44E-06 | -60.0-7462.-8000. |
| 3563.6017 | 4 | 3602-0.21E-01-0.71E+02 | 0.73E+02 | 0.44E-06 | -60.0-7471.-8000. |
| 3566.8074 | 4 | 3606-0.21E-01-0.71E+02 | 0.73E+02 | 0.44E-06 | -60.0-7497.-8000. |
| 3570.1266 | 3 | 3609-0.22E-01-0.71E+02 | 0.73E+02 | 0.44E-06 | -60.0-7513.-8000. |
| 3574.3942 | 3 | 3612-0.22E-01-0.71E+02 | 0.73E+02 | 0.44E-06 | -60.0-7522.-8000. |

Time ItW ItCum vTop SvTop SvRoot SvBot hTop hRoot hBot

|           |   |                        |          |          |                   |
|-----------|---|------------------------|----------|----------|-------------------|
| 3579.5154 | 4 | 3616-0.22E-01-0.71E+02 | 0.73E+02 | 0.44E-06 | -60.0-7507.-8000. |
| 3584.6365 | 4 | 3620-0.21E-01-0.71E+02 | 0.73E+02 | 0.44E-06 | -60.0-7485.-8000. |
| 3589.7577 | 5 | 3625-0.21E-01-0.72E+02 | 0.73E+02 | 0.44E-06 | -60.0-7474.-8000. |
| 3594.8788 | 3 | 3628-0.21E-01-0.72E+02 | 0.74E+02 | 0.44E-06 | -60.0-7467.-8000. |
| 3600.0000 | 2 | 3630-0.21E-01-0.72E+02 | 0.74E+02 | 0.44E-06 | -60.0-7464.-8000. |
| 3607.2000 | 2 | 3632-0.20E-01-0.72E+02 | 0.74E+02 | 0.45E-06 | -60.0-7461.-8000. |
| 3616.4571 | 9 | 3641-0.17E-01-0.72E+02 | 0.74E+02 | 0.45E-06 | -60.0-7406.-8000. |
| 3622.6286 | 5 | 3646-0.16E-01-0.72E+02 | 0.74E+02 | 0.44E-06 | -60.0-7372.-8000. |
| 3628.8000 | 8 | 3654-0.19E-01-0.72E+02 | 0.74E+02 | 0.45E-06 | -60.0-7388.-8000. |
| 3633.1200 | 4 | 3658-0.19E-01-0.72E+02 | 0.74E+02 | 0.45E-06 | -60.0-7396.-8000. |
| 3637.4400 | 5 | 3663-0.21E-01-0.72E+02 | 0.74E+02 | 0.44E-06 | -60.0-7438.-8000. |
| 3641.7600 | 6 | 3669-0.21E-01-0.73E+02 | 0.74E+02 | 0.45E-06 | -60.0-7463.-8000. |
| 3646.0800 | 4 | 3673-0.21E-01-0.73E+02 | 0.75E+02 | 0.45E-06 | -60.0-7478.-8000. |
| 3650.4000 | 2 | 3675-0.21E-01-0.73E+02 | 0.75E+02 | 0.45E-06 | -60.0-7486.-8000. |
| 3655.8000 | 6 | 3681-0.21E-01-0.73E+02 | 0.75E+02 | 0.44E-06 | -60.0-7492.-8000. |
| 3661.2000 | 7 | 3688-0.21E-01-0.73E+02 | 0.75E+02 | 0.45E-06 | -60.0-7473.-8000. |
| 3664.8000 | 4 | 3692-0.20E-01-0.73E+02 | 0.75E+02 | 0.45E-06 | -60.0-7465.-8000. |
| 3668.4000 | 6 | 3698-0.21E-01-0.73E+02 | 0.75E+02 | 0.45E-06 | -60.0-7488.-8000. |
| 3672.0000 | 4 | 3702-0.22E-01-0.73E+02 | 0.75E+02 | 0.45E-06 | -60.0-7503.-8000. |
| 3676.0825 | 3 | 3705-0.22E-01-0.73E+02 | 0.75E+02 | 0.45E-06 | -60.0-7512.-8000. |

Time ItW ItCum vTop SvTop SvRoot SvBot hTop hRoot hBot

|           |   |                        |          |          |                   |
|-----------|---|------------------------|----------|----------|-------------------|
| 3681.3897 | 4 | 3709-0.22E-01-0.73E+02 | 0.75E+02 | 0.45E-06 | -60.0-7507.-8000. |
| 3686.6969 | 5 | 3714-0.21E-01-0.74E+02 | 0.75E+02 | 0.45E-06 | -60.0-7480.-8000. |
| 3692.0042 | 5 | 3719-0.21E-01-0.74E+02 | 0.75E+02 | 0.45E-06 | -60.0-7468.-8000. |
| 3697.3114 | 3 | 3722-0.21E-01-0.74E+02 | 0.76E+02 | 0.45E-06 | -60.0-7460.-8000. |
| 3704.2108 | 3 | 3725-0.20E-01-0.74E+02 | 0.76E+02 | 0.45E-06 | -60.0-7456.-8000. |
| 3713.1800 | 9 | 3734-0.18E-01-0.74E+02 | 0.76E+02 | 0.45E-06 | -60.0-7412.-8000. |
| 3719.4584 | 4 | 3738-0.17E-01-0.74E+02 | 0.76E+02 | 0.45E-06 | -60.0-7377.-8000. |
| 3725.7369 | 8 | 3746-0.19E-01-0.74E+02 | 0.76E+02 | 0.45E-06 | -60.0-7389.-8000. |
| 3730.1318 | 4 | 3750-0.19E-01-0.74E+02 | 0.76E+02 | 0.45E-06 | -60.0-7396.-8000. |
| 3734.5267 | 5 | 3755-0.21E-01-0.74E+02 | 0.76E+02 | 0.45E-06 | -60.0-7436.-8000. |
| 3738.9216 | 6 | 3761-0.21E-01-0.75E+02 | 0.76E+02 | 0.45E-06 | -60.0-7461.-8000. |

|           |   |                        |          |          |                   |
|-----------|---|------------------------|----------|----------|-------------------|
| 3743.3165 | 4 | 3765-0.21E-01-0.75E+02 | 0.76E+02 | 0.45E-06 | -60.0-7475.-8000. |
| 3747.7114 | 2 | 3767-0.21E-01-0.75E+02 | 0.77E+02 | 0.45E-06 | -60.0-7483.-8000. |
| 3753.4248 | 6 | 3773-0.21E-01-0.75E+02 | 0.77E+02 | 0.45E-06 | -60.0-7489.-8000. |
| 3759.1382 | 8 | 3781-0.20E-01-0.75E+02 | 0.77E+02 | 0.45E-06 | -60.0-7464.-8000. |
| 3763.1376 | 4 | 3785-0.20E-01-0.75E+02 | 0.77E+02 | 0.45E-06 | -60.0-7455.-8000. |
| 3767.1370 | 5 | 3790-0.21E-01-0.75E+02 | 0.77E+02 | 0.45E-06 | -60.0-7477.-8000. |
| 3771.1363 | 5 | 3795-0.21E-01-0.75E+02 | 0.77E+02 | 0.45E-06 | -60.0-7490.-8000. |
| 3775.1357 | 3 | 3798-0.22E-01-0.75E+02 | 0.77E+02 | 0.45E-06 | -60.0-7498.-8000. |
| 3780.3349 | 2 | 3800-0.22E-01-0.75E+02 | 0.77E+02 | 0.45E-06 | -60.0-7503.-8000. |

Time ItW ItCum vTop SvTop SvRoot SvBot hTop hRoot hBot

|           |   |                        |          |          |                   |
|-----------|---|------------------------|----------|----------|-------------------|
| 3787.0938 | 8 | 3808-0.20E-01-0.76E+02 | 0.77E+02 | 0.45E-06 | -60.0-7476.-8000. |
| 3791.8251 | 4 | 3812-0.19E-01-0.76E+02 | 0.77E+02 | 0.45E-06 | -60.0-7448.-8000. |
| 3796.5563 | 8 | 3820-0.21E-01-0.76E+02 | 0.78E+02 | 0.45E-06 | -60.0-7459.-8000. |
| 3799.8682 | 4 | 3824-0.21E-01-0.76E+02 | 0.78E+02 | 0.45E-06 | -60.0-7464.-8000. |
| 3803.1801 | 4 | 3828-0.21E-01-0.76E+02 | 0.78E+02 | 0.45E-06 | -60.0-7492.-8000. |
| 3806.4920 | 3 | 3831-0.22E-01-0.76E+02 | 0.78E+02 | 0.45E-06 | -60.0-7508.-8000. |
| 3810.7974 | 2 | 3833-0.22E-01-0.76E+02 | 0.78E+02 | 0.45E-06 | -60.0-7521.-8000. |
| 3816.3945 | 7 | 3840-0.21E-01-0.76E+02 | 0.78E+02 | 0.45E-06 | -60.0-7507.-8000. |
| 3820.3124 | 4 | 3844-0.21E-01-0.76E+02 | 0.78E+02 | 0.45E-06 | -60.0-7484.-8000. |
| 3824.2304 | 7 | 3851-0.21E-01-0.76E+02 | 0.78E+02 | 0.45E-06 | -60.0-7494.-8000. |
| 3826.9729 | 3 | 3854-0.22E-01-0.76E+02 | 0.78E+02 | 0.45E-06 | -60.0-7499.-8000. |
| 3830.5383 | 4 | 3858-0.22E-01-0.76E+02 | 0.78E+02 | 0.45E-06 | -60.0-7525.-8000. |
| 3834.1036 | 5 | 3863-0.22E-01-0.77E+02 | 0.78E+02 | 0.45E-06 | -60.0-7523.-8000. |
| 3837.6690 | 4 | 3867-0.22E-01-0.77E+02 | 0.78E+02 | 0.45E-06 | -60.0-7522.-8000. |
| 3841.2343 | 2 | 3869-0.22E-01-0.77E+02 | 0.79E+02 | 0.45E-06 | -60.0-7522.-8000. |
| 3845.8692 | 3 | 3872-0.22E-01-0.77E+02 | 0.79E+02 | 0.45E-06 | -60.0-7520.-8000. |
| 3851.8946 | 7 | 3879-0.21E-01-0.77E+02 | 0.79E+02 | 0.45E-06 | -60.0-7496.-8000. |
| 3856.1124 | 6 | 3885-0.20E-01-0.77E+02 | 0.79E+02 | 0.45E-06 | -60.0-7471.-8000. |
| 3860.3302 | 7 | 3892-0.21E-01-0.77E+02 | 0.79E+02 | 0.45E-06 | -60.0-7482.-8000. |
| 3863.2827 | 4 | 3896-0.21E-01-0.77E+02 | 0.79E+02 | 0.45E-06 | -60.0-7487.-8000. |

Time ItW ItCum vTop SvTop SvRoot SvBot hTop hRoot hBot

|           |   |                        |          |          |                   |
|-----------|---|------------------------|----------|----------|-------------------|
| 3866.2351 | 3 | 3899-0.22E-01-0.77E+02 | 0.79E+02 | 0.45E-06 | -60.0-7510.-8000. |
| 3870.0733 | 5 | 3904-0.22E-01-0.77E+02 | 0.79E+02 | 0.45E-06 | -60.0-7526.-8000. |
| 3873.9115 | 5 | 3909-0.22E-01-0.77E+02 | 0.79E+02 | 0.45E-06 | -60.0-7519.-8000. |
| 3877.7204 | 3 | 3912-0.22E-01-0.77E+02 | 0.79E+02 | 0.46E-06 | -60.0-7516.-8000. |
| 3882.6175 | 2 | 3914-0.22E-01-0.78E+02 | 0.79E+02 | 0.45E-06 | -60.0-7513.-8000. |
| 3888.4940 | 7 | 3921-0.21E-01-0.78E+02 | 0.80E+02 | 0.46E-06 | -60.0-7489.-8000. |
| 3893.1952 | 5 | 3926-0.20E-01-0.78E+02 | 0.80E+02 | 0.46E-06 | -60.0-7465.-8000. |
| 3897.8964 | 6 | 3932-0.21E-01-0.78E+02 | 0.80E+02 | 0.46E-06 | -60.0-7471.-8000. |
| 3902.5976 | 4 | 3936-0.21E-01-0.78E+02 | 0.80E+02 | 0.46E-06 | -60.0-7474.-8000. |
| 3907.2988 | 2 | 3938-0.21E-01-0.78E+02 | 0.80E+02 | 0.46E-06 | -60.0-7477.-8000. |
| 3912.0000 | 3 | 3941-0.21E-01-0.78E+02 | 0.80E+02 | 0.46E-06 | -60.0-7477.-8000. |
| 3917.9028 | 3 | 3944-0.21E-01-0.78E+02 | 0.80E+02 | 0.46E-06 | -60.0-7478.-8000. |
| 3925.5763 | 8 | 3952-0.19E-01-0.78E+02 | 0.80E+02 | 0.46E-06 | -60.0-7447.-8000. |

|           |   |                        |          |          |                   |
|-----------|---|------------------------|----------|----------|-------------------|
| 3930.9478 | 4 | 3956-0.18E-01-0.79E+02 | 0.80E+02 | 0.46E-06 | -60.0-7416.-8000. |
| 3936.3193 | 8 | 3964-0.20E-01-0.79E+02 | 0.80E+02 | 0.46E-06 | -60.0-7429.-8000. |
| 3940.0794 | 4 | 3968-0.20E-01-0.79E+02 | 0.81E+02 | 0.46E-06 | -60.0-7436.-8000. |
| 3943.8395 | 4 | 3972-0.21E-01-0.79E+02 | 0.81E+02 | 0.46E-06 | -60.0-7469.-8000. |
| 3947.5995 | 4 | 3976-0.22E-01-0.79E+02 | 0.81E+02 | 0.46E-06 | -60.0-7490.-8000. |
| 3951.3596 | 3 | 3979-0.22E-01-0.79E+02 | 0.81E+02 | 0.46E-06 | -60.0-7502.-8000. |
| 3956.2476 | 3 | 3982-0.22E-01-0.79E+02 | 0.81E+02 | 0.46E-06 | -60.0-7510.-8000. |

| Time | ItW | ItCum | vTop | SvTop | SvRoot | SvBot | hTop | hRoot | hBot |
|------|-----|-------|------|-------|--------|-------|------|-------|------|
|------|-----|-------|------|-------|--------|-------|------|-------|------|

|           |   |                        |          |          |                   |
|-----------|---|------------------------|----------|----------|-------------------|
| 3962.6021 | 7 | 3989-0.21E-01-0.79E+02 | 0.81E+02 | 0.46E-06 | -60.0-7486.-8000. |
| 3967.0503 | 5 | 3994-0.20E-01-0.79E+02 | 0.81E+02 | 0.46E-06 | -60.0-7459.-8000. |
| 3971.4984 | 7 | 4001-0.21E-01-0.79E+02 | 0.81E+02 | 0.46E-06 | -60.0-7471.-8000. |
| 3974.6121 | 4 | 4005-0.21E-01-0.79E+02 | 0.81E+02 | 0.46E-06 | -60.0-7477.-8000. |
| 3977.7258 | 4 | 4009-0.21E-01-0.80E+02 | 0.81E+02 | 0.46E-06 | -60.0-7502.-8000. |
| 3980.8395 | 3 | 4012-0.22E-01-0.80E+02 | 0.81E+02 | 0.46E-06 | -60.0-7516.-8000. |
| 3984.8873 | 3 | 4015-0.22E-01-0.80E+02 | 0.82E+02 | 0.46E-06 | -60.0-7527.-8000. |
| 3990.1495 | 4 | 4019-0.22E-01-0.80E+02 | 0.82E+02 | 0.46E-06 | -60.0-7512.-8000. |
| 3995.4116 | 5 | 4024-0.21E-01-0.80E+02 | 0.82E+02 | 0.46E-06 | -60.0-7484.-8000. |
| 4000.6738 | 5 | 4029-0.21E-01-0.80E+02 | 0.82E+02 | 0.46E-06 | -60.0-7471.-8000. |
| 4005.9359 | 3 | 4032-0.21E-01-0.80E+02 | 0.82E+02 | 0.46E-06 | -60.0-7462.-8000. |
| 4012.7767 | 3 | 4035-0.20E-01-0.80E+02 | 0.82E+02 | 0.46E-06 | -60.0-7458.-8000. |
| 4021.6698 | 8 | 4043-0.18E-01-0.80E+02 | 0.82E+02 | 0.46E-06 | -60.0-7414.-8000. |
| 4027.8949 | 3 | 4046-0.17E-01-0.81E+02 | 0.82E+02 | 0.46E-06 | -60.0-7378.-8000. |
| 4035.9876 | 9 | 4055-0.18E-01-0.81E+02 | 0.82E+02 | 0.46E-06 | -60.0-7397.-8000. |
| 4041.6524 | 7 | 4062-0.17E-01-0.81E+02 | 0.83E+02 | 0.46E-06 | -60.0-7379.-8000. |
| 4045.6178 | 5 | 4067-0.19E-01-0.81E+02 | 0.83E+02 | 0.46E-06 | -60.0-7395.-8000. |
| 4049.5832 | 4 | 4071-0.21E-01-0.81E+02 | 0.83E+02 | 0.46E-06 | -60.0-7441.-8000. |
| 4053.5486 | 5 | 4076-0.21E-01-0.81E+02 | 0.83E+02 | 0.46E-06 | -60.0-7470.-8000. |
| 4057.5140 | 4 | 4080-0.22E-01-0.81E+02 | 0.83E+02 | 0.46E-06 | -60.0-7488.-8000. |

| Time | ItW | ItCum | vTop | SvTop | SvRoot | SvBot | hTop | hRoot | hBot |
|------|-----|-------|------|-------|--------|-------|------|-------|------|
|------|-----|-------|------|-------|--------|-------|------|-------|------|

|           |   |                        |          |          |                   |
|-----------|---|------------------------|----------|----------|-------------------|
| 4061.4794 | 2 | 4082-0.22E-01-0.81E+02 | 0.83E+02 | 0.46E-06 | -60.0-7498.-8000. |
| 4066.6345 | 3 | 4085-0.22E-01-0.81E+02 | 0.83E+02 | 0.47E-06 | -60.0-7504.-8000. |
| 4073.3360 | 7 | 4092-0.21E-01-0.81E+02 | 0.83E+02 | 0.47E-06 | -60.0-7476.-8000. |
| 4078.0271 | 5 | 4097-0.19E-01-0.82E+02 | 0.83E+02 | 0.47E-06 | -60.0-7448.-8000. |
| 4082.7182 | 8 | 4105-0.21E-01-0.82E+02 | 0.83E+02 | 0.47E-06 | -60.0-7460.-8000. |
| 4086.0019 | 4 | 4109-0.21E-01-0.82E+02 | 0.83E+02 | 0.47E-06 | -60.0-7466.-8000. |
| 4089.2857 | 4 | 4113-0.21E-01-0.82E+02 | 0.84E+02 | 0.47E-06 | -60.0-7493.-8000. |
| 4092.5694 | 3 | 4116-0.22E-01-0.82E+02 | 0.84E+02 | 0.47E-06 | -60.0-7509.-8000. |
| 4096.8383 | 2 | 4118-0.22E-01-0.82E+02 | 0.84E+02 | 0.47E-06 | -60.0-7522.-8000. |
| 4102.3545 | 7 | 4125-0.21E-01-0.82E+02 | 0.84E+02 | 0.47E-06 | -60.0-7508.-8000. |
| 4106.2391 | 4 | 4129-0.21E-01-0.82E+02 | 0.84E+02 | 0.47E-06 | -60.0-7486.-8000. |
| 4110.1238 | 7 | 4136-0.21E-01-0.82E+02 | 0.84E+02 | 0.47E-06 | -60.0-7496.-8000. |
| 4112.8431 | 3 | 4139-0.22E-01-0.82E+02 | 0.84E+02 | 0.47E-06 | -60.0-7500.-8000. |
| 4116.3781 | 4 | 4143-0.22E-01-0.82E+02 | 0.84E+02 | 0.47E-06 | -60.0-7526.-8000. |
| 4119.9403 | 5 | 4148-0.22E-01-0.82E+02 | 0.84E+02 | 0.47E-06 | -60.0-7524.-8000. |

|           |   |                        |          |          |                   |
|-----------|---|------------------------|----------|----------|-------------------|
| 4123.5025 | 4 | 4152-0.22E-01-0.83E+02 | 0.84E+02 | 0.47E-06 | -60.0-7523.-8000. |
| 4127.0647 | 2 | 4154-0.22E-01-0.83E+02 | 0.84E+02 | 0.47E-06 | -60.0-7522.-8000. |
| 4132.0518 | 3 | 4157-0.22E-01-0.83E+02 | 0.84E+02 | 0.47E-06 | -60.0-7521.-8000. |
| 4138.7012 | 7 | 4164-0.21E-01-0.83E+02 | 0.85E+02 | 0.47E-06 | -60.0-7485.-8000. |
| 4143.1341 | 5 | 4169-0.19E-01-0.83E+02 | 0.85E+02 | 0.47E-06 | -60.0-7456.-8000. |

Time ItW ItCum vTop SvTop SvRoot SvBot hTop hRoot hBot

|           |   |                        |          |          |                   |
|-----------|---|------------------------|----------|----------|-------------------|
| 4147.5671 | 7 | 4176-0.21E-01-0.83E+02 | 0.85E+02 | 0.47E-06 | -60.0-7470.-8000. |
| 4149.7835 | 3 | 4179-0.21E-01-0.83E+02 | 0.85E+02 | 0.47E-06 | -60.0-7474.-8000. |
| 4152.0000 | 3 | 4182-0.21E-01-0.83E+02 | 0.85E+02 | 0.47E-06 | -60.0-7505.-8000. |
| 4155.8056 | 4 | 4186-0.21E-01-0.83E+02 | 0.85E+02 | 0.47E-06 | -60.0-7540.-8000. |
| 4159.6112 | 8 | 4194-0.19E-01-0.83E+02 | 0.85E+02 | 0.47E-06 | -60.0-7516.-8000. |
| 4162.2751 | 4 | 4198-0.19E-01-0.83E+02 | 0.85E+02 | 0.47E-06 | -60.0-7506.-8000. |
| 4164.9390 | 3 | 4201-0.19E-01-0.83E+02 | 0.85E+02 | 0.47E-06 | -60.0-7505.-8000. |
| 4168.4021 | 3 | 4204-0.19E-01-0.83E+02 | 0.85E+02 | 0.47E-06 | -60.0-7503.-8000. |
| 4172.9041 | 2 | 4206-0.19E-01-0.84E+02 | 0.85E+02 | 0.47E-06 | -60.0-7492.-8000. |
| 4178.7568 | 3 | 4209-0.19E-01-0.84E+02 | 0.85E+02 | 0.48E-06 | -60.0-7470.-8000. |
| 4186.3652 | 5 | 4214-0.18E-01-0.84E+02 | 0.85E+02 | 0.47E-06 | -60.0-7438.-8000. |
| 4193.9736 | 5 | 4219-0.17E-01-0.84E+02 | 0.86E+02 | 0.48E-06 | -60.0-7397.-8000. |
| 4201.5820 | 7 | 4226-0.17E-01-0.84E+02 | 0.86E+02 | 0.48E-06 | -60.0-7377.-8000. |
| 4206.9079 | 3 | 4229-0.17E-01-0.84E+02 | 0.86E+02 | 0.47E-06 | -60.0-7370.-8000. |
| 4213.8315 | 7 | 4236-0.18E-01-0.84E+02 | 0.86E+02 | 0.47E-06 | -60.0-7406.-8000. |
| 4218.6781 | 7 | 4243-0.18E-01-0.84E+02 | 0.86E+02 | 0.47E-06 | -60.0-7400.-8000. |
| 4222.0707 | 4 | 4247-0.18E-01-0.84E+02 | 0.86E+02 | 0.47E-06 | -60.0-7414.-8000. |
| 4225.4633 | 3 | 4250-0.18E-01-0.84E+02 | 0.86E+02 | 0.47E-06 | -60.0-7443.-8000. |
| 4229.8736 | 3 | 4253-0.18E-01-0.85E+02 | 0.86E+02 | 0.47E-06 | -60.0-7466.-8000. |
| 4235.6071 | 4 | 4257-0.19E-01-0.85E+02 | 0.86E+02 | 0.47E-06 | -60.0-7462.-8000. |

Time ItW ItCum vTop SvTop SvRoot SvBot hTop hRoot hBot

|           |   |                        |          |          |                   |
|-----------|---|------------------------|----------|----------|-------------------|
| 4241.3406 | 5 | 4262-0.18E-01-0.85E+02 | 0.86E+02 | 0.47E-06 | -60.0-7443.-8000. |
| 4247.0740 | 4 | 4266-0.18E-01-0.85E+02 | 0.87E+02 | 0.47E-06 | -60.0-7435.-8000. |
| 4252.8075 | 2 | 4268-0.18E-01-0.85E+02 | 0.87E+02 | 0.47E-06 | -60.0-7428.-8000. |
| 4260.2734 | 3 | 4271-0.18E-01-0.85E+02 | 0.87E+02 | 0.47E-06 | -60.0-7424.-8000. |
| 4270.2278 | 8 | 4279-0.17E-01-0.85E+02 | 0.87E+02 | 0.47E-06 | -60.0-7384.-8000. |
| 4277.3381 | 5 | 4284-0.16E-01-0.85E+02 | 0.87E+02 | 0.47E-06 | -60.0-7346.-8000. |
| 4284.4484 | 8 | 4292-0.17E-01-0.85E+02 | 0.87E+02 | 0.47E-06 | -60.0-7356.-8000. |
| 4289.5272 | 5 | 4297-0.17E-01-0.86E+02 | 0.87E+02 | 0.48E-06 | -60.0-7361.-8000. |
| 4294.6060 | 4 | 4301-0.18E-01-0.86E+02 | 0.87E+02 | 0.48E-06 | -60.0-7396.-8000. |
| 4299.6848 | 5 | 4306-0.18E-01-0.86E+02 | 0.87E+02 | 0.48E-06 | -60.0-7417.-8000. |
| 4304.7636 | 3 | 4309-0.18E-01-0.86E+02 | 0.88E+02 | 0.48E-06 | -60.0-7430.-8000. |
| 4312.3818 | 3 | 4312-0.18E-01-0.86E+02 | 0.88E+02 | 0.48E-06 | -60.0-7439.-8000. |
| 4320.0000 | 8 | 4320-0.17E-01-0.86E+02 | 0.88E+02 | 0.48E-06 | -60.0-7399.-8000. |
| 4324.3206 | 4 | 4324-0.17E-01-0.86E+02 | 0.88E+02 | 0.48E-06 | -60.0-7388.-8000. |
| 4328.6412 | 6 | 4330-0.18E-01-0.86E+02 | 0.88E+02 | 0.48E-06 | -60.0-7416.-8000. |
| 4332.9617 | 3 | 4333-0.18E-01-0.86E+02 | 0.88E+02 | 0.48E-06 | -60.0-7437.-8000. |
| 4338.5785 | 3 | 4336-0.18E-01-0.86E+02 | 0.88E+02 | 0.48E-06 | -60.0-7453.-8000. |



4346.2101 7 4343-0.18E-01-0.87E+02 0.88E+02 0.48E-06 -60.0-7437.-8000.  
4351.2979 6 4349-0.17E-01-0.87E+02 0.88E+02 0.48E-06 -60.0-7411.-8000.  
4356.3857 7 4356-0.18E-01-0.87E+02 0.88E+02 0.48E-06 -60.0-7423.-8000.

Time ItW ItCum vTop SvTop SvRoot SvBot hTop hRoot hBot

4359.9471 3 4359-0.18E-01-0.87E+02 0.89E+02 0.48E-06 -60.0-7429.-8000.  
4364.5261 3 4362-0.18E-01-0.87E+02 0.89E+02 0.48E-06 -60.0-7458.-8000.  
4370.0209 6 4368-0.18E-01-0.87E+02 0.89E+02 0.48E-06 -60.0-7458.-8000.  
4375.5156 4 4372-0.18E-01-0.87E+02 0.89E+02 0.48E-06 -60.0-7445.-8000.  
4381.0104 4 4376-0.18E-01-0.87E+02 0.89E+02 0.48E-06 -60.0-7440.-8000.  
4386.5052 2 4378-0.18E-01-0.87E+02 0.89E+02 0.48E-06 -60.0-7435.-8000.  
4392.0000 2 4380-0.18E-01-0.87E+02 0.89E+02 0.48E-06 -60.0-7432.-8000.  
4399.8606 2 4382-0.18E-01-0.88E+02 0.89E+02 0.48E-06 -60.0-7430.-8000.  
4410.0793 9 4391-0.17E-01-0.88E+02 0.89E+02 0.48E-06 -60.0-7378.-8000.  
4417.2325 6 4397-0.15E-01-0.88E+02 0.89E+02 0.48E-06 -60.0-7340.-8000.  
4424.3856 8 4405-0.17E-01-0.88E+02 0.90E+02 0.48E-06 -60.0-7351.-8000.  
4429.3928 5 4410-0.17E-01-0.88E+02 0.90E+02 0.48E-06 -60.0-7356.-8000.  
4434.4000 4 4414-0.17E-01-0.88E+02 0.90E+02 0.48E-06 -60.0-7390.-8000.  
4439.4072 4 4418-0.18E-01-0.88E+02 0.90E+02 0.48E-06 -60.0-7410.-8000.  
4444.4144 4 4422-0.18E-01-0.88E+02 0.90E+02 0.48E-06 -60.0-7423.-8000.  
4449.4216 2 4424-0.18E-01-0.88E+02 0.90E+02 0.48E-06 -60.0-7430.-8000.  
4455.9309 3 4427-0.18E-01-0.89E+02 0.90E+02 0.48E-06 -60.0-7433.-8000.  
4464.3931 7 4434-0.17E-01-0.89E+02 0.90E+02 0.48E-06 -60.0-7408.-8000.  
4470.3166 5 4439-0.17E-01-0.89E+02 0.90E+02 0.49E-06 -60.0-7379.-8000.  
4476.2401 8 4447-0.17E-01-0.89E+02 0.91E+02 0.49E-06 -60.0-7391.-8000.

Time ItW ItCum vTop SvTop SvRoot SvBot hTop hRoot hBot

4480.3865 3 4450-0.17E-01-0.89E+02 0.91E+02 0.49E-06 -60.0-7397.-8000.  
4485.7769 4 4454-0.17E-01-0.89E+02 0.91E+02 0.49E-06 -60.0-7432.-8000.  
4491.1673 6 4460-0.17E-01-0.89E+02 0.91E+02 0.49E-06 -60.0-7429.-8000.  
4496.5577 4 4464-0.18E-01-0.89E+02 0.91E+02 0.49E-06 -60.0-7428.-8000.  
4501.9481 2 4466-0.18E-01-0.89E+02 0.91E+02 0.49E-06 -60.0-7427.-8000.  
4508.9556 2 4468-0.18E-01-0.89E+02 0.91E+02 0.49E-06 -60.0-7426.-8000.  
4518.0654 7 4475-0.17E-01-0.90E+02 0.91E+02 0.49E-06 -60.0-7395.-8000.  
4524.4422 5 4480-0.16E-01-0.90E+02 0.91E+02 0.49E-06 -60.0-7364.-8000.  
4530.8190 8 4488-0.17E-01-0.90E+02 0.91E+02 0.49E-06 -60.0-7376.-8000.  
4535.2828 4 4492-0.17E-01-0.90E+02 0.92E+02 0.49E-06 -60.0-7382.-8000.  
4539.7466 4 4496-0.17E-01-0.90E+02 0.92E+02 0.49E-06 -60.0-7410.-8000.  
4544.2104 4 4500-0.18E-01-0.90E+02 0.92E+02 0.49E-06 -60.0-7427.-8000.  
4548.6741 3 4503-0.18E-01-0.90E+02 0.92E+02 0.49E-06 -60.0-7438.-8000.  
4554.4771 2 4505-0.18E-01-0.90E+02 0.92E+02 0.50E-06 -60.0-7445.-8000.  
4562.2294 6 4511-0.17E-01-0.90E+02 0.92E+02 0.49E-06 -60.0-7426.-8000.  
4569.9817 8 4519-0.17E-01-0.90E+02 0.92E+02 0.49E-06 -60.0-7389.-8000.  
4575.2623 4 4523-0.17E-01-0.91E+02 0.92E+02 0.49E-06 -60.0-7377.-8000.  
4580.5430 5 4528-0.17E-01-0.91E+02 0.92E+02 0.49E-06 -60.0-7399.-8000.  
4585.6887 4 4532-0.17E-01-0.91E+02 0.92E+02 0.49E-06 -60.0-7411.-8000.

4590.8344 3 4535-0.18E-01-0.91E+02 0.93E+02 0.49E-06 -60.0-7422.-8000.

Time ItW ItCum vTop SvTop SvRoot SvBot hTop hRoot hBot

4597.6953 4 4539-0.18E-01-0.91E+02 0.93E+02 0.49E-06 -60.0-7428.-8000.  
4604.5562 7 4546-0.17E-01-0.91E+02 0.93E+02 0.49E-06 -60.0-7406.-8000.  
4609.1302 3 4549-0.17E-01-0.91E+02 0.93E+02 0.49E-06 -60.0-7398.-8000.  
4614.8477 6 4555-0.17E-01-0.91E+02 0.93E+02 0.49E-06 -60.0-7424.-8000.  
4620.5651 6 4561-0.17E-01-0.91E+02 0.93E+02 0.49E-06 -60.0-7421.-8000.  
4626.2826 2 4563-0.17E-01-0.91E+02 0.93E+02 0.49E-06 -60.0-7420.-8000.  
4632.0000 2 4565-0.18E-01-0.92E+02 0.93E+02 0.49E-06 -60.0-7418.-8000.  
4640.1211 4 4569-0.17E-01-0.92E+02 0.93E+02 0.49E-06 -60.0-7417.-8000.  
4648.2422 8 4577-0.17E-01-0.92E+02 0.93E+02 0.49E-06 -60.0-7379.-8000.  
4653.9270 5 4582-0.16E-01-0.92E+02 0.94E+02 0.49E-06 -60.0-7366.-8000.  
4659.6118 6 4588-0.17E-01-0.92E+02 0.94E+02 0.49E-06 -60.0-7386.-8000.  
4665.2966 4 4592-0.17E-01-0.92E+02 0.94E+02 0.49E-06 -60.0-7400.-8000.  
4670.9814 2 4594-0.17E-01-0.92E+02 0.94E+02 0.49E-06 -60.0-7409.-8000.  
4678.3716 3 4597-0.18E-01-0.92E+02 0.94E+02 0.49E-06 -60.0-7413.-8000.  
4687.9788 7 4604-0.17E-01-0.93E+02 0.94E+02 0.49E-06 -60.0-7381.-8000.  
4694.7039 5 4609-0.16E-01-0.93E+02 0.94E+02 0.49E-06 -60.0-7350.-8000.  
4701.4290 8 4617-0.17E-01-0.93E+02 0.94E+02 0.49E-06 -60.0-7363.-8000.  
4706.1366 4 4621-0.17E-01-0.93E+02 0.94E+02 0.49E-06 -60.0-7369.-8000.  
4710.8442 4 4625-0.17E-01-0.93E+02 0.95E+02 0.50E-06 -60.0-7400.-8000.  
4715.5517 4 4629-0.18E-01-0.93E+02 0.95E+02 0.50E-06 -60.0-7419.-8000.

Time ItW ItCum vTop SvTop SvRoot SvBot hTop hRoot hBot

4720.2593 3 4632-0.18E-01-0.93E+02 0.95E+02 0.50E-06 -60.0-7431.-8000.  
4726.3791 3 4635-0.18E-01-0.93E+02 0.95E+02 0.50E-06 -60.0-7439.-8000.  
4734.3349 6 4641-0.17E-01-0.93E+02 0.95E+02 0.49E-06 -60.0-7417.-8000.  
4742.2907 7 4648-0.17E-01-0.93E+02 0.95E+02 0.49E-06 -60.0-7381.-8000.  
4747.8598 4 4652-0.17E-01-0.94E+02 0.95E+02 0.49E-06 -60.0-7369.-8000.  
4753.4288 6 4658-0.17E-01-0.94E+02 0.95E+02 0.49E-06 -60.0-7390.-8000.  
4758.9979 4 4662-0.17E-01-0.94E+02 0.95E+02 0.49E-06 -60.0-7403.-8000.  
4764.5669 2 4664-0.17E-01-0.94E+02 0.95E+02 0.50E-06 -60.0-7412.-8000.  
4771.8067 3 4667-0.18E-01-0.94E+02 0.96E+02 0.50E-06 -60.0-7417.-8000.  
4781.2184 8 4675-0.17E-01-0.94E+02 0.96E+02 0.50E-06 -60.0-7387.-8000.  
4787.8066 5 4680-0.16E-01-0.94E+02 0.96E+02 0.50E-06 -60.0-7355.-8000.  
4794.3948 8 4688-0.17E-01-0.94E+02 0.96E+02 0.50E-06 -60.0-7368.-8000.  
4799.0065 4 4692-0.17E-01-0.94E+02 0.96E+02 0.49E-06 -60.0-7374.-8000.  
4803.6182 4 4696-0.17E-01-0.94E+02 0.96E+02 0.49E-06 -60.0-7404.-8000.  
4808.2299 4 4700-0.18E-01-0.95E+02 0.96E+02 0.50E-06 -60.0-7422.-8000.  
4812.8417 3 4703-0.18E-01-0.95E+02 0.96E+02 0.50E-06 -60.0-7434.-8000.  
4818.7575 3 4706-0.18E-01-0.95E+02 0.96E+02 0.50E-06 -60.0-7441.-8000.  
4826.3636 4 4710-0.18E-01-0.95E+02 0.96E+02 0.50E-06 -60.0-7421.-8000.  
4833.9696 6 4716-0.17E-01-0.95E+02 0.97E+02 0.50E-06 -60.0-7388.-8000.  
4841.5757 5 4721-0.17E-01-0.95E+02 0.97E+02 0.50E-06 -60.0-7374.-8000.

| Time      | ItW | ItCum | vTop      | SvTop     | SvRoot   | SvBot    | hTop  | hRoot | hBot   |
|-----------|-----|-------|-----------|-----------|----------|----------|-------|-------|--------|
| 4849.1818 | 3   | 4724  | -0.17E-01 | -0.95E+02 | 0.97E+02 | 0.50E-06 | -60.0 | -7363 | -.8000 |
| 4860.5909 | 3   | 4727  | -0.16E-01 | -0.95E+02 | 0.97E+02 | 0.50E-06 | -60.0 | -7357 | -.8000 |
| 4872.0000 | 9   | 4736  | -0.14E-01 | -0.96E+02 | 0.97E+02 | 0.50E-06 | -60.0 | -7293 | -.8000 |
| 4879.0924 | 8   | 4744  | -0.14E-01 | -0.96E+02 | 0.97E+02 | 0.50E-06 | -60.0 | -7272 | -.8000 |
| 4884.0570 | 6   | 4750  | -0.12E-01 | -0.96E+02 | 0.97E+02 | 0.51E-06 | -60.0 | -7269 | -.8000 |
| 4889.0217 | 4   | 4754  | -0.12E-01 | -0.96E+02 | 0.97E+02 | 0.51E-06 | -60.0 | -7269 | -.8000 |
| 4893.9864 | 2   | 4756  | -0.12E-01 | -0.96E+02 | 0.97E+02 | 0.51E-06 | -60.0 | -7266 | -.8000 |
| 4900.4404 | 4   | 4760  | -0.12E-01 | -0.96E+02 | 0.97E+02 | 0.51E-06 | -60.0 | -7262 | -.8000 |
| 4906.8945 | 2   | 4762  | -0.12E-01 | -0.96E+02 | 0.98E+02 | 0.51E-06 | -60.0 | -7253 | -.8000 |
| 4915.2848 | 2   | 4764  | -0.12E-01 | -0.96E+02 | 0.98E+02 | 0.51E-06 | -60.0 | -7245 | -.8000 |
| 4926.1922 | 2   | 4766  | -0.11E-01 | -0.96E+02 | 0.98E+02 | 0.51E-06 | -60.0 | -7229 | -.8000 |
| 4940.4181 | 3   | 4769  | -0.11E-01 | -0.96E+02 | 0.98E+02 | 0.51E-06 | -60.0 | -7198 | -.8000 |
| 4959.9591 | 5   | 4774  | -0.11E-01 | -0.97E+02 | 0.98E+02 | 0.51E-06 | -60.0 | -7144 | -.8000 |
| 4979.8965 | 7   | 4781  | -0.11E-01 | -0.97E+02 | 0.98E+02 | 0.51E-06 | -60.0 | -7069 | -.8000 |
| 4991.9172 | 5   | 4786  | -0.10E-01 | -0.97E+02 | 0.98E+02 | 0.51E-06 | -60.0 | -7047 | -.8000 |
| 5003.9379 | 7   | 4793  | -0.11E-01 | -0.97E+02 | 0.99E+02 | 0.51E-06 | -60.0 | -7088 | -.8000 |
| 5012.9534 | 3   | 4796  | -0.11E-01 | -0.97E+02 | 0.99E+02 | 0.51E-06 | -60.0 | -7110 | -.8000 |
| 5026.4767 | 3   | 4799  | -0.11E-01 | -0.97E+02 | 0.99E+02 | 0.51E-06 | -60.0 | -7176 | -.8000 |
| 5040.0000 | 7   | 4806  | -0.11E-01 | -0.98E+02 | 0.99E+02 | 0.51E-06 | -60.0 | -7156 | -.8000 |
| 5048.2195 | 3   | 4809  | -0.11E-01 | -0.98E+02 | 0.99E+02 | 0.51E-06 | -60.0 | -7150 | -.8000 |

| Time      | ItW | ItCum | vTop      | SvTop     | SvRoot   | SvBot    | hTop  | hRoot | hBot   |
|-----------|-----|-------|-----------|-----------|----------|----------|-------|-------|--------|
| 5059.1920 | 4   | 4813  | -0.11E-01 | -0.98E+02 | 0.99E+02 | 0.52E-06 | -60.0 | -7188 | -.8000 |
| 5070.1646 | 4   | 4817  | -0.11E-01 | -0.98E+02 | 0.99E+02 | 0.52E-06 | -60.0 | -7182 | -.8000 |
| 5081.1372 | 3   | 4820  | -0.11E-01 | -0.98E+02 | 0.99E+02 | 0.52E-06 | -60.0 | -7182 | -.8000 |
| 5094.8529 | 2   | 4822  | -0.11E-01 | -0.98E+02 | 0.10E+03 | 0.52E-06 | -60.0 | -7180 | -.8000 |
| 5114.5037 | 6   | 4828  | -0.11E-01 | -0.98E+02 | 0.10E+03 | 0.52E-06 | -60.0 | -7143 | -.8000 |
| 5125.2518 | 7   | 4835  | -0.11E-01 | -0.98E+02 | 0.10E+03 | 0.52E-06 | -60.0 | -7106 | -.8000 |
| 5136.0000 | 8   | 4843  | -0.11E-01 | -0.99E+02 | 0.10E+03 | 0.52E-06 | -60.0 | -7132 | -.8000 |
| 5144.8485 | 3   | 4846  | -0.11E-01 | -0.99E+02 | 0.10E+03 | 0.52E-06 | -60.0 | -7150 | -.8000 |
| 5156.3516 | 7   | 4853  | -0.11E-01 | -0.99E+02 | 0.10E+03 | 0.52E-06 | -60.0 | -7171 | -.8000 |
| 5164.4037 | 3   | 4856  | -0.11E-01 | -0.99E+02 | 0.10E+03 | 0.52E-06 | -60.0 | -7162 | -.8000 |
| 5174.8715 | 6   | 4862  | -0.11E-01 | -0.99E+02 | 0.10E+03 | 0.52E-06 | -60.0 | -7177 | -.8000 |
| 5185.3393 | 3   | 4865  | -0.11E-01 | -0.99E+02 | 0.10E+03 | 0.52E-06 | -60.0 | -7167 | -.8000 |
| 5198.9474 | 3   | 4868  | -0.11E-01 | -0.99E+02 | 0.10E+03 | 0.52E-06 | -60.0 | -7163 | -.8000 |
| 5216.6527 | 6   | 4874  | -0.11E-01 | -0.99E+02 | 0.10E+03 | 0.52E-06 | -60.0 | -7130 | -.8000 |
| 5234.3579 | 5   | 4879  | -0.10E-01 | -0.10E+03 | 0.10E+03 | 0.53E-06 | -60.0 | -7083 | -.8000 |
| 5252.0632 | 8   | 4887  | -0.10E-01 | -0.10E+03 | 0.10E+03 | 0.53E-06 | -60.0 | -7057 | -.8000 |
| 5264.4569 | 3   | 4890  | -0.10E-01 | -0.10E+03 | 0.10E+03 | 0.53E-06 | -60.0 | -7049 | -.8000 |
| 5280.3916 | 7   | 4897  | -0.11E-01 | -0.10E+03 | 0.10E+03 | 0.53E-06 | -60.0 | -7092 | -.8000 |
| 5292.3427 | 6   | 4903  | -0.10E-01 | -0.10E+03 | 0.10E+03 | 0.53E-06 | -60.0 | -7084 | -.8000 |
| 5304.2937 | 5   | 4908  | -0.11E-01 | -0.10E+03 | 0.10E+03 | 0.53E-06 | -60.0 | -7107 | -.8000 |

| Time | ItW | ItCum | vTop | SvTop | SvRoot | SvBot | hTop | hRoot | hBot |
|------|-----|-------|------|-------|--------|-------|------|-------|------|
|------|-----|-------|------|-------|--------|-------|------|-------|------|

5316.2448 3 4911-0.11E-01-0.10E+03 0.10E+03 0.53E-06 -60.0-7120.-8000.  
 5331.1836 2 4913-0.11E-01-0.10E+03 0.10E+03 0.53E-06 -60.0-7130.-8000.  
 5352.1053 7 4920-0.11E-01-0.10E+03 0.10E+03 0.54E-06 -60.0-7101.-8000.  
 5364.0527 5 4925-0.10E-01-0.10E+03 0.10E+03 0.54E-06 -60.0-7064.-8000.  
 5376.0000 8 4933-0.10E-01-0.10E+03 0.10E+03 0.54E-06 -60.0-7089.-8000.  
 5385.3318 3 4936-0.10E-01-0.10E+03 0.10E+03 0.54E-06 -60.0-7104.-8000.  
 5397.4631 10 4946-0.78E-02-0.10E+03 0.10E+03 0.54E-06 -60.0-7036.-8000.  
 5405.9550 8 4954-0.72E-02-0.10E+03 0.10E+03 0.54E-06 -60.0-6994.-8000.  
 5411.8993 4 4958-0.69E-02-0.10E+03 0.10E+03 0.54E-06 -60.0-6967.-8000.  
 5417.8436 3 4961-0.68E-02-0.10E+03 0.10E+03 0.54E-06 -60.0-6940.-8000.  
 5425.5713 4 4965-0.67E-02-0.10E+03 0.10E+03 0.54E-06 -60.0-6908.-8000.  
 5433.2989 4 4969-0.66E-02-0.10E+03 0.10E+03 0.54E-06 -60.0-6878.-8000.  
 5441.0265 3 4972-0.65E-02-0.10E+03 0.10E+03 0.54E-06 -60.0-6852.-8000.  
 5451.0724 3 4975-0.64E-02-0.10E+03 0.10E+03 0.54E-06 -60.0-6819.-8000.  
 5464.1321 4 4979-0.63E-02-0.10E+03 0.10E+03 0.54E-06 -60.0-6785.-8000.  
 5477.1918 3 4982-0.63E-02-0.10E+03 0.10E+03 0.54E-06 -60.0-6756.-8000.  
 5494.1694 3 4985-0.62E-02-0.10E+03 0.10E+03 0.54E-06 -60.0-6727.-8000.  
 5516.2403 4 4989-0.62E-02-0.10E+03 0.10E+03 0.55E-06 -60.0-6698.-8000.  
 5538.3112 3 4992-0.61E-02-0.10E+03 0.10E+03 0.55E-06 -60.0-6672.-8000.  
 5566.0223 3 4995-0.61E-02-0.10E+03 0.10E+03 0.55E-06 -60.0-6652.-8000.

Time ItW ItCum vTop SvTop SvRoot SvBot hTop hRoot hBot

5601.6101 2 4997-0.61E-02-0.10E+03 0.10E+03 0.55E-06 -60.0-6617.-8000.  
 5637.1586 2 4999-0.61E-02-0.10E+03 0.10E+03 0.55E-06 -60.0-6577.-8000.  
 5672.8898 3 5002-0.61E-02-0.10E+03 0.10E+03 0.56E-06 -60.0-6555.-8000.  
 5708.7858 2 5004-0.61E-02-0.10E+03 0.10E+03 0.56E-06 -60.0-6543.-8000.  
 5734.3929 2 5006-0.61E-02-0.10E+03 0.10E+03 0.56E-06 -60.0-6537.-8000.  
 5760.0000 3 5009-0.61E-02-0.10E+03 0.10E+03 0.56E-06 -60.0-6565.-8000.  
 5792.0000 3 5012-0.61E-02-0.10E+03 0.10E+03 0.57E-06 -60.0-6583.-8000.  
 5824.0000 3 5015-0.61E-02-0.10E+03 0.11E+03 0.57E-06 -60.0-6571.-8000.  
 5856.0000 2 5017-0.61E-02-0.10E+03 0.11E+03 0.57E-06 -60.0-6565.-8000.

Run time [sec] 0.420000016689301

Calculations have finished successfully.

Press Enter to continue

DOI: 10.1134/S1064229314050093DOI: 10.1134/S1064229314050093
